# 1 Global biobank analyses provide lessons for developing polygenic risk scores 2 across diverse cohorts

3 Ying Wang<sup>1,2,3,\*</sup>, Shinichi Namba<sup>4</sup>, Esteban Lopera<sup>5</sup>, Sini Kerminen<sup>6</sup>, Kristin Tsuo<sup>1,2,3</sup>, Kristi Läll<sup>7</sup>, Masahiro  
4 Kanai<sup>1,2,3,8,9</sup>, Wei Zhou<sup>1,2,3</sup>, Kuan-Han Wu<sup>10</sup>, Marie-Julie Favé<sup>11</sup>, Laxmi Bhatta<sup>12</sup>, Philip Awadalla<sup>11,13</sup>, Ben  
5 Brumpton<sup>12,14,15</sup>, Patrick Deelen<sup>5,16</sup>, Kristian Hveem<sup>12,14</sup>, Valeria Lo Faro<sup>17,18,19</sup>, Reedik Mägi<sup>7</sup>, Yoshinori  
6 Murakami<sup>20</sup>, Serena Sanna<sup>5,21</sup>, Jordan W. Smoller<sup>22</sup>, Jasmina Uzunovic<sup>11</sup>, Brooke N. Wolford<sup>10,12</sup>, Global  
7 Biobank Meta-analysis Initiative, Cristen Willer<sup>12,23,24,25</sup>, Eric R. Gamazon<sup>26,27,28</sup>, Nancy J. Cox<sup>26,28</sup>, Ida  
8 Surakka<sup>23</sup>, Yukinori Okada<sup>4,29,30,31,32</sup>, Alicia R. Martin<sup>1,2,3,†,\*</sup>, Jibril Hirbo<sup>26,28,‡,\*</sup>

## 10 Affiliations

- 11 1. Analytic and Translational Genetics Unit, Massachusetts General Hospital, Boston, MA 02114, USA
- 12 2. Stanley Center for Psychiatric Research, Broad Institute of MIT and Harvard, Cambridge, MA 02142, USA
- 13 3. Program in Medical and Population Genetics, Broad Institute of MIT and Harvard, Cambridge, MA 02142, USA
- 14 4. Department of Statistical Genetics, Osaka University Graduate School of Medicine, Suita 565-0871, Japan
- 15 5. University of Groningen, UMCG, Department of Genetics, Groningen, the Netherlands
- 16 6. Institute for Molecular Medicine Finland, FIMM, HiLIFE, University of Helsinki, Helsinki, Finland
- 17 7. Estonian Genome Centre, Institute of Genomics, University of Tartu, Tartu, Estonia
- 18 8. Department of Biomedical Informatics, Harvard Medical School, Boston, MA, USA
- 19 9. Department of Statistical Genetics, Osaka University Graduate School of Medicine, Suita, Japan
- 20 10. Department of Computational Medicine and Bioinformatics, University of Michigan, Ann Arbor MI, 48103, USA
- 21 11. Ontario Institute for Cancer Research, Toronto, Ontario, Canada
- 22 12. K.G. Jebsen Center for Genetic Epidemiology, Department of Public Health and Nursing, NTNU, Norwegian University of Science  
23 and Technology, Trondheim, 7030, Norway
- 24 13. Department of Molecular Genetics, University of Toronto, Toronto, ON, Canada
- 25 14. HUNT Research Centre, Department of Public Health and Nursing, NTNU, Norwegian University of Science and Technology,  
26 Levanger, 7600, Norway
- 27 15. Clinic of Medicine, St. Olavs Hospital, Trondheim University Hospital, Trondheim, 7030, Norway
- 28 16. Oncode Institute, Utrecht, The Netherlands
- 29 17. Department of Ophthalmology, University Medical Center Groningen, University of Groningen, Groningen, The Netherlands
- 30 18. Department of Clinical Genetics, Amsterdam University Medical Center (AMC), Amsterdam, The Netherlands
- 31 19. Department of Immunology, Genetics and Pathology, Science for Life Laboratory, Uppsala University, Uppsala, Sweden
- 32 20. Division of Molecular Pathology, Institute of Medical Science, The University of Tokyo, Tokyo, Japan
- 33 21. Institute for Genetics and Biomedical Research (IRGB), National Research Council (CNR), Cagliari 09100, Italy
- 34 22. Psychiatric and Neurodevelopmental Genetics Unit, Center for Genomic Medicine, Massachusetts General Hospital, Boston, MA  
35 02114, USA
- 36 23. Department of Internal Medicine, University of Michigan, Ann Arbor, MI 48109, USA
- 37 24. Department of Biostatistics and Center for Statistical Genetics, University of Michigan, Ann Arbor, MI 48109, USA
- 38 25. Department of Human Genetics, University of Michigan, Ann Arbor, MI 48109, USA
- 39 26. Department of Medicine, Division of Genetic Medicine, Vanderbilt University School of Medicine, Nashville, TN, USA
- 40 27. MRC Epidemiology Unit, University of Cambridge, Cambridge, UK
- 41 28. Vanderbilt Genetics Institute, Vanderbilt University Medical Center, Nashville, TN, USA
- 42 29. Laboratory for Systems Genetics, RIKEN Center for Integrative Medical Sciences, Yokohama, Japan
- 43 30. Laboratory of Statistical Immunology, Immunology Frontier Research Center (WPI-IFReC), Osaka University, Suita 565-0871,  
44 Japan
- 45 31. Department of Genome Informatics, Graduate School of Medicine, the University of Tokyo, Tokyo 113-0033, Japan.
- 46 32. Center for Infectious Disease Education and Research (CiDER), Osaka University, Suita 565-0871, Japan

47  
48  
49 1

<sup>1†</sup>These authors contributed equally.

Lead Contact: Ying Wang ([yiwang@broadinstitute.org](mailto:yiwang@broadinstitute.org))

\*Correspondence: [yiwang@broadinstitute.org](mailto:yiwang@broadinstitute.org), [armartin@broadinstitute.org](mailto:armartin@broadinstitute.org), [jibril.hirbo@vumc.org](mailto:jibril.hirbo@vumc.org).

50

## 51 Summary

52 With the increasing availability of biobank-scale datasets that incorporate both genomic data and  
53 electronic health records, many associations between genetic variants and phenotypes of interest  
54 have been discovered. Polygenic risk scores (PRS), which are being widely explored in precision  
55 medicine, use the results of association studies to predict the genetic component of disease risk  
56 by accumulating risk alleles weighted by their effect sizes. However, few studies have thoroughly  
57 investigated best practices for PRS in global populations across different diseases. In this study,  
58 we utilize data from the Global-Biobank Meta-analysis Initiative (GBMI), which consists of  
59 individuals from diverse ancestries and across continents, to explore methodological  
60 considerations and PRS prediction performance in 9 different biobanks for 14 disease endpoints.  
61 Specifically, we constructed PRS using heuristic (pruning and thresholding, P+T) and Bayesian  
62 (PRS-CS) methods. We found that the genetic architecture, such as SNP-based heritability and  
63 polygenicity, varied greatly among endpoints. For both PRS construction methods, using a  
64 European ancestry LD reference panel resulted in comparable or higher prediction accuracy  
65 compared to several other non-European based panels; this is largely attributable to European  
66 descent populations still comprising the majority of GBMI participants. PRS-CS overall  
67 outperformed the classic P+T method, especially for endpoints with higher SNP-based heritability.  
68 For example, substantial improvements are observed in East-Asian ancestry (EAS) using PRS-  
69 CS compared to P+T for heart failure (HF) and chronic obstructive pulmonary disease (COPD).  
70 Notably, prediction accuracy is heterogeneous across endpoints, biobanks, and ancestries,  
71 especially for asthma which has known variation in disease prevalence across global populations.  
72 Overall, we provide lessons for PRS construction, evaluation, and interpretation using the GBMI  
73 and highlight the importance of best practices for PRS in the biobank-scale genomics era.

74

## 75 Keywords

76 Global-biobank meta-analysis initiative (GBMI); polygenic risk scores (PRS); multi-ancestry  
77 genetic prediction; accuracy heterogeneity

## 78 Introduction

79 Population- and hospital-based biobanks are increasingly coupling genomic and electronic health  
80 record data at sufficient scale to evaluate the potential of personalized medicine<sup>1</sup>. The growth of  
81 these paired datasets enables genome-wide association studies (GWAS) to estimate increasingly  
82 precise genetic effect sizes contributing to disease risk. In turn, GWAS summary statistics can be  
83 used to aggregate the effects of many genetic markers (usually in the form of single-nucleotide  
84 polymorphisms, SNPs) to estimate individuals' genetic predispositions for complex diseases via  
85 polygenic risk scores (PRS). As GWAS power has increased, PRS accuracy has also improved,  
86 with PRS for some traits having comparable accuracies to independent biomarkers already  
87 routinely used in clinical risk models<sup>2</sup>. Consequently, several areas of medicine have already  
88 begun investigating the potential for integrating PRS alongside other biomarkers and information  
89 currently used in clinical risk models<sup>3-5</sup>. However, evidence of clinical utility for PRS across  
90 disease areas is currently limited or inconsistent<sup>2,6-8</sup>. Furthermore, many methods have been  
91 developed to compute PRS, each with different strengths and weaknesses<sup>9-11</sup>. Thus, guidelines  
92 that delineate best practices while considering a range of real-world healthcare settings and  
93 disease areas are critically needed.

94 Best practices for PRS are critical but lacking for a range of considerations that have been shown  
95 to contribute to variability in accuracy and interpretation. These include guidance for variable  
96 phenotype definitions and precision for both discovery GWAS and target populations, which  
97 varies with cohort ascertainment strategy, geography, environmental exposures and other  
98 common covariates<sup>12-14</sup>. Other considerations include varying genetic architectures, statistical  
99 power of the discovery GWAS, and PRS methods, which vary in which variants (generally in the  
100 form of SNPs) are included and how weights are calculated<sup>9,15</sup>. A particularly pernicious issue  
101 requiring best practices is regarding maximizing generalizability of PRS accuracy among ancestry  
102 groups<sup>16,17</sup>. Developing best practices for PRS therefore requires harmonized genetic data  
103 spanning diverse phenotypes, participants, and ascertainment strategies.

104 To facilitate the development of best practices, we evaluate several considerations for PRS in the  
105 Global Biobank Meta-analysis Initiative (GBMI). GBMI brings together population- and hospital-  
106 based biobanks developed in twelve countries spanning four different continents: North America  
107 (USA, Canada), East Asia (Japan and China), Europe (Iceland, UK, Estonian, Finland, Scotland,  
108 Norway and Netherlands) and Oceania (Australia). GBMI aggregates paired genetic and  
109 phenotypic data from >2.1 million individuals across diverse ancestries, including: ~1.4 million

110 Europeans (EUR), ~18,000 Admixed Americans (AMR), ~1,600 Middle Eastern (MID), ~31,000  
111 Central and South Asians (CSA), ~341,000 East Asians (EAS) and ~33,000 Africans (AFR).  
112 Biobanks have collated phenotype information through different sources including electronic  
113 health records, self-report data from epidemiological survey questionnaires, billing codes, doctors'  
114 narrative notes, and death registries. Detailed description of each biobank is found in Zhou et  
115 al.<sup>18</sup>.

116 Here we outline a framework for PRS analyses of multi-ancestry GWAS across multiple biobanks,  
117 as shown in **Figure 1**. The endpoints examined are: asthma, chronic obstructive pulmonary  
118 disease (COPD), heart failure (HF), stroke, acute appendicitis (AcApp), venous thromboembolism  
119 (VTE), gout, appendectomy, primary open-angle glaucoma (POAG), uterine cancer (UtC),  
120 abdominal aortic aneurysm (AAA), idiopathic pulmonary fibrosis (IPF), thyroid cancer (ThC) and  
121 hypertrophic or obstructive cardiomyopathy (HCM), for which the phenotype definitions can be  
122 found in Zhou et al.<sup>18</sup>. Those 14 endpoints represent the pilot effort of GBMI, which greatly vary  
123 in disease prevalence. It ranges from <1% for AAA, IPF, ThC and HCM to ~6% for COPD and  
124 ~9% for asthma. Some endpoints (for example, appendectomy which can be extracted from EHR  
125 procedure codes) have not been broadly studied in previous GWAS studies. By evaluating PRS  
126 across 14 endpoints (**Table S1 and Table S2**) and 9 biobanks, we review and explore practical  
127 considerations for three steps: genetic architecture estimation, PRS method optimization and  
128 selection, and evaluation of PRS accuracy. Our framework applies to biobank-scale resources  
129 with both homogenous and diverse ancestries.

## 130 Results

131 The diverse ancestries included in GBMI accounted for different proportions ranging from ~76.4%  
132 for EUR, 0.1% for MID, 1.0% for AMR, 1.7% for CSA, 18.9% for EAS and 1.8% for AFR. We  
133 explored the genetic architecture of 14 endpoints using GWAS summary statistics from all  
134 ancestries and EUR only in GBMI<sup>19</sup>. We used leave-one-biobank-out meta-analyzed GWAS in  
135 GBMI as our primary discovery datasets for the following PRS analyses. The ancestry  
136 compositions of discovery GWAS used in this study can be found in **Table S2**.

### 137 Genetic architecture of 14 endpoints in GBMI

138 We first estimated the genetic architecture of 14 endpoints based on HapMap3 SNPs (see STAR  
139 Methods). Different prediction methods vary in which SNPs are selected and which effect sizes

140 are assigned to them. Thus, understanding the genetic architecture of complex traits along with  
141 sample size and ancestry composition of the discovery GWAS is critical for choosing optimal  
142 prediction methods. For example, the SNP-based heritability ( $h_{SNP}^2$ ) bounds PRS accuracy. We  
143 used SBayesS<sup>20</sup> to estimate  $h_{SNP}^2$ , polygenicity (the proportion of SNPs with nonzero effects), and  
144 the relationship between minor allele frequency (MAF) and SNP effects (i.e., a metric of negative  
145 selection, hereafter denoted as S) for the 14 endpoints in GBMI. Meta-analyses in GBMI were  
146 performed across up to 18 different biobanks on 14 endpoints using an inverse-variance weighted  
147 method as described in Zhou et al.<sup>18</sup>, including individuals from diverse ancestries. In addition to  
148 presenting results using EUR only GWAS summary statistics (EUR GWAS), we also reported  
149 estimates using meta-analysis from all ancestries (multi-ancestry GWAS). We explored whether  
150 we can reasonably use EUR-based LD reference to approximate the LD of multi-ancestry GWAS  
151 in GBMI using the attenuation ratio statistic estimated from LD score regression (LDSC) (see  
152 STAR Methods). The attenuation ratio can be used to quantify whether there was a strong LD  
153 mismatch, for which the values  $> 0.2$ , between GWAS summary statistics and the LD reference  
154 panel<sup>21</sup>. We found that the ratio of LDSC using the EUR LD reference panel for GBMI multi-  
155 ancestry GWAS was not statistically larger than 0.2. Also, the values were not statistically different  
156 from those achieved using GBMI EUR GWAS. This is consistent with a previous study which has  
157 found that EUR-based LD can reasonably approximate the LD in their multi-ancestry GWAS  
158 consisting of ~75% EUR individuals<sup>22</sup>.

159  
160 Most diseases analyzed here had low but significant  $h_{SNP}^2$  and a range of polygenicity estimates  
161 (**Figure 2**). Note that here we reported the  $h_{SNP}^2$  on the liability scale (see STAR Methods). The  
162 SBayesS model failed to converge for HCM, likely because its estimated  $h_{SNP}^2$  was found to be  
163 not significantly different from 0 using LDSC. This could be ascribed to its known predisposing  
164 monogenic mutations, the low disease prevalence and heterogeneous subtypes<sup>19</sup>. Therefore, this  
165 endpoint was dropped from downstream analyses. We observed that the estimates were overall  
166 higher using multi-ancestry GWAS compared to EUR GWAS (**Figure 2**). Overall, the median  
167 estimates of SNPs with nonzero effects across 13 endpoints were 0.34% for multi-ancestry  
168 GWAS and 0.14% for EUR GWAS ( $p$ -value = 0.002, paired wilcoxon signed rank test),  
169 respectively. The corresponding median estimates for  $h_{SNP}^2$  were 0.051 for multi-ancestry GWAS  
170 and 0.043 for EUR GWAS ( $p$ -value = 0.002, paired wilcoxon signed rank test), respectively. The  
171 largest difference of 0.06 was found in gout. This could be due to higher  $h_{SNP}^2$  estimated in non-  
172 EUR GWAS. For example, the estimates for  $h_{SNP}^2$  using EUR and EAS GWAS was 0.051 (s.e. =  
173 0.0027) and 0.088 (s.e. = 0.005), respectively. Moreover, we have also found that the estimated

174 effect sizes of two gout-associated loci (close to genes *ALDH16A1* and *SLC2A9*) were different  
175 across ancestries<sup>19</sup>. Specifically, we observed that a few top gout-associated variants showed  
176 much higher allele frequencies in EAS as compared to EUR, thus resulting in larger variance  
177 explained (**Figure S1**).

178  
179 Polygenicity and  $h_{SNP}^2$  estimates varied greatly among different endpoints. Specifically, the  $h_{SNP}^2$   
180 estimates were highest for asthma and gout using multi-ancestry GWAS ( $h_{SNP}^2= 0.085$ , s.e. =  
181 0.0011 and  $h_{SNP}^2= 0.111$ , s.e. = 0.0024, respectively), while asthma was found to be much more  
182 polygenic than gout. We caution that the numeric interpretation of polygenicity depends on various  
183 factors and cannot be interpreted as the number of causal variants. For example, larger and more  
184 powerful GWAS tend to discover more trait-associated variants, thus appear to have higher  
185 polygenicity. Because we used the same set of SNPs in SBayesS analyses for all endpoints, we  
186 hence used the results as a relative measurement of the degree of polygenicity. We observed  
187 that the estimate of polygenicity for UtC using multi-ancestry GWAS was not statistically different  
188 from 0 (Wald test,  $p$ -value > 0.05/13) due to limited power observed as relatively low  $h_{SNP}^2$ . Overall,  
189 COPD and asthma were estimated to be the most polygenic traits, followed by HF and stroke,  
190 whereas AcApp, UtC and ThC were the least polygenic. Lastly, we observed signals of negative  
191 selection for traits including asthma ( $S = -0.56$ , s.e. = 0.05), COPD ( $S = -0.40$ , s.e. = 0.11) and  
192 POAG ( $S = -0.50$ , s.e. = 0.15) when considering using EUR GWAS, consistent with empirical  
193 findings of negative selection explaining extreme polygenicity of complex traits<sup>23</sup>.

194  
195 In summary, we observed largely varied key parameters of genetic architecture among 13  
196 endpoints using multi-ancestry and EUR only GWAS. We found that asthma and COPD had the  
197 highest  $h_{SNP}^2$  as well as polygenicity. We excluded HCM in our subsequent prediction analyses  
198 due to lower evidence of polygenicity and its non-significant  $h_{SNP}^2$ .

199 **Optimal prediction performance using heuristic methods depends on**  
200 **phenotype-specific genetic architecture**

201 We first evaluated the pruning and thresholding (P+T,  $p$ -value thresholds ranged from  $5 \times 10^{-8}$  to  
202 1) method using the EUR-based LD reference panel for all 13 endpoints in the UKBB and BBJ,  
203 respectively, given its widespread use and relative simplicity. Note in this study, we used leave-  
204 one-biobank-out meta-analyzed GWAS as the discovery GWAS when evaluating PRS in that  
205 specific biobank (**Table S2**). We further explored how different factors impact the prediction

206 performance of P+T in diverse ancestry groups, including LD parameters (LD window sizes and  
207 LD  $r^2$  thresholds), LD reference panels (ancestry composition, sample size, and SNP density) and  
208 per-variant effective sample size ( $N_{eff}$ ) and MAF (see STAR Methods).

209

210 First of all, we selected the optimal  $p$ -value threshold (the  $p$ -value threshold with highest prediction  
211 accuracy, as measured by  $R^2$  on the liability scale,  $R_{liability}^2$ , if not specified) in the tuning cohorts  
212 and evaluated the accuracies in the test cohorts (see STAR Methods). Specifically, we found that  
213 for UKBB with diverse ancestries, using ancestry-specific tuning cohorts provided better  
214 prediction performance as compared to that using EUR-based tuning cohorts (**Figure S2**). We  
215 found that the optimal  $p$ -value threshold differed considerably between various endpoints (**Figure**  
216 **S3 and Table S3**). This pattern is found to be related to polygenicity of studied endpoints; but it  
217 is also due to a combination of factors such as the GWAS discovery cohort sample size, disease  
218 prevalence, trait-specific genetic architecture, and genetic and environmental differences  
219 between discovery and target ancestries<sup>24</sup>. For example, when the optimal  $p$ -value was  
220 determined in the UKBB-EUR subset, the less polygenic traits of ThC (106 variants) and AcApp  
221 (17 variants) showed highest accuracy at  $p$ -value thresholds of  $5 \times 10^{-5}$  and  $5 \times 10^{-7}$ , respectively,  
222 while for the more polygenic traits of stroke (115,609 variants), HF (115,741 variants), asthma  
223 (7,858 variants) and COPD (29,751 variants) achieved the highest accuracy when including SNPs  
224 with  $p$ -value less than 1, 1, 0.01 and 0.1, respectively. To investigate whether ancestries affect  
225 the optimal  $p$ -value threshold, we replicated our analysis in the BBJ (**Figure S3**). In the BBJ,  $p$ -  
226 value thresholds of  $5 \times 10^{-5}$ , 0.01 and  $5 \times 10^{-5}$  presented best performance for gout, stroke and  
227 HF, respectively. Consistent with previous studies, these results suggest that optimal prediction  
228 parameters (here  $p$ -value threshold specifically) for P+T appear to be dependent on the ancestry  
229 of the target data among other factors<sup>25,26</sup>. Further, we found that for more polygenic traits  
230 including asthma, COPD, stroke and HF, prediction was more accurate with more variants in the  
231 PRS (i.e., a less significant threshold) than using the genome-wide significance threshold ( $p$ -value  
232  $< 5 \times 10^{-8}$ ). On the contrary, less polygenic traits showed no or modest improvement with less  
233 stringent  $p$ -value thresholds, especially for traits such as gout which has trait-associated SNPs  
234 with large effects. However, these trends were less obvious in the BBJ which might be attributed  
235 to the small proportion of EAS included in the discovery GWAS. One caveat we noted was that  
236 fixed LD parameters of P+T were used, thus the results might be impacted by additional  
237 optimization of those parameters, which we will further explore below.

238

239 We found that further optimizing LD parameters, including LD window size and LD  $r^2$  thresholds,  
240 of P+T did not contribute to significant improvement of accuracy across endpoints. Specifically,  
241 we observed that the median accuracies with versus without LD parameter optimization were of  
242 0.018 and 0.015, respectively (**Figure S4**). However, there was slight but statistically significant  
243 accuracy improvement in EUR for asthma ( $\sim 0.006$ ). This might be due to more stratified signals  
244 being tagged, which results in noise reduction of the predictor. As compared to using fixed LD  
245 parameters, we found similar relationships between polygenicity and optimal  $p$ -value thresholds  
246 when optimizing LD parameters in the UKBB. Specifically, the optimal  $p$ -value thresholds were  
247 overall less stringent for more polygenic traits and more stringent for less polygenic traits. For  
248 example, the accuracy using LD parameter optimization in the UKBB-EUR was highest with the  
249  $p$ -value thresholds of 0.5, 1, 0.1 and 0.2 for the highly polygenic traits of stroke, HF, asthma and  
250 COPD, respectively. In contrast, the optimal  $p$ -value thresholds of  $5 \times 10^{-5}$  and  $5 \times 10^{-7}$  were  
251 observed for less polygenic traits of ThC and AcApp, respectively. To balance the computational  
252 burden and signal-to-noise ratio, we used an LD window size of 250Kb and LD  $r^2$  of 0.1 as before.  
253 We repeated our analyses using genome-wide common SNPs and compared the prediction  
254 accuracy with that using HapMap3 SNPs only (**Figure S4 and Table S3**). There were no  
255 significant improvements in prediction accuracies using a denser SNP set, which suggests that  
256 HapMap3 SNP set represents genome-wide common SNPs well. Specifically, we found the  
257 accuracies in EUR for the most polygenic traits, asthma ( $\sim 0.006$ ), COPD ( $\sim 0.005$ ) and HF  
258 ( $\sim 0.004$ ), to be slightly improved using HapMap3 SNPs. Moreover, we found that the sample sizes  
259 of the LD reference panel had little impact on P+T performance (**Figure S5**); but the parameters  
260 described above including LD window sizes and LD  $r^2$  thresholds had a larger impact on accuracy.  
261 We also showed that using 1KG-EUR as the LD reference panel performed well compared to  
262 using other ancestral populations with similar sample sizes in the 1KG dataset, which could be  
263 explained by the overrepresentation of EUR participants ( $\sim 76.4\%$ ) in GBMI (**Figure S6 and Table**  
264 **S3**). We further ran LDSC using the EUR-based LD reference panel on leave-specific-biobank-  
265 out GWAS in GBMI to estimate the attenuation ratio statistic (see STAR Methods). Similar to  
266 previous findings, we found that even in leave-UKBB-out GWAS with the lowest EUR proportion  
267 (**Table S2**), its LD information can be well approximated using the EUR reference panel, which  
268 was reflected by the values of ratio not statistically larger than 0.2 and not statistically different  
269 from EUR GWAS in GBMI. We therefore used 1KG-EUR as the LD reference panel for all  
270 subsequent P+T analyses. But the choice of external LD reference panel for multi-ancestry GWAS  
271 needs further exploration especially when the discovery GWAS becomes more diverse.  
272



273 Finally, we investigated the impact of per-variant effective sample size heterogeneity. Since GBMI  
274 consists of a number of biobanks with diverse ancestries, the number of samples used for meta-  
275 analysis was notably heterogeneous among the variants; the majority of the variants in the GWAS  
276 meta-analysis had only a limited number of effective samples ( $N_{eff}$ ) (**Figure 3-A**). Therefore, although  
277 sample size heterogeneity is not usually considered for PRS, it may confound the PRS prediction  
278 accuracy in the case of global biobank collaborations. By filtering the variants according to  $N_{eff}$  per-  
279 variant (i.e.,  $N_{eff}$  larger than 50% or 80% thresholds of the maximum  $N_{eff}$  of the trait of interest, see  
280 STAR Methods), we observed that the  $R_{liability}^2$  increased substantially for less stringent thresholds  
281 ( $p$ -value  $> 5 \times 10^{-5}$ ) in the UKBB (**Figure S7-A**). As a representative example, the largest  $R_{liability}^2$   
282 (0.034) was obtained for asthma when the  $p$ -value threshold was  $5 \times 10^{-3}$ , whereas the  $R_{liability}^2$  was  
283  $6.6 \times 10^{-3}$  at the threshold without  $N_{eff}$  filtering (**Figure 3-B and Table S4**). Next, we investigated  
284 whether  $N_{eff}$  filtering could be substituted by other filtering criteria. Although excluding variants with  
285 MAF less than 0.1 partially compensated for PRS transferability, the improvement of  $N_{eff}$  filtering in  
286  $R_{liability}^2$  was still observed (**Figure S7-B**). Heterogeneity in  $N_{eff}$  might be confounding especially in  
287 multi-ancestry meta-analyses because it can be distorted by heterogeneous allele frequencies and  
288 imputation quality spectra among ancestries. Indeed, as rarer variants tend to be more ancestry-  
289 specific, variants with low  $N_{eff}$  tend to be unique to specific ancestries (**Figure 3-C**). Of note, the  
290 dependency of  $R_{liability}^2$  on the  $N_{eff}$  was, however, largely rectified for most of the traits by using only  
291 HapMap3 SNPs (**Figure S7-C**). Given that the  $R_{liability}^2$  for HapMap3 SNPs was comparable to that  
292 for genome-wide SNPs (**Figure S4**), filtering to HapMap3 SNPs might be suitable for meta-analysis  
293 of diverse populations. On the other hand, HapMap3 SNPs generally have good imputation quality,  
294 although a recent study shows that relaxing imputation INFO score from 0.9 to 0.3 has negligible  
295 impacts on prediction accuracy<sup>9</sup>. We replicated the  $N_{eff}$  filtering in BBJ and confirmed that improved  
296  $R_{liability}^2$  attributable to  $N_{eff}$  filtering was also observed (**Figure S7-D**). Although the effect of the  $N_{eff}$   
297 filtering was diminished by the MAF filtering in relatively stringent thresholds ( $p$ -value  $< 5 \times 10^{-4}$ ), the  
298 effect was still observed in the other thresholds (**Figure S7-E**). Using only HapMap3 SNPs almost  
299 completely reduced the dependency of  $R_{liability}^2$  on the  $N_{eff}$  (**Figure S7-F**).

300  
301 Overall, we found the prediction performance of P+T to be affected by a combination of factors, with  
302  $p$ -value thresholds showing larger effects as compared to other parameters, such as LD window sizes,  
303 LD  $r^2$  thresholds, and variant filtering by  $N_{eff}$  or MAF. Moreover, the optimal  $p$ -value threshold varied  
304 substantially between different endpoints in GBMI. We also demonstrated that restricted use of  
305 HapMap3 SNPs showed comparable or better prediction accuracy relative to using genome-wide

306 common SNPs for P+T, particularly for GWAS from diverse cohorts as in GBMI with genetic variants  
307 showing considerable heterogeneity in effective sample sizes.

## 308 Bayesian approaches for calculating PRS improve accuracy

309 We also evaluated fully genome-wide polygenic risk scores, by first fine-tuning the parameters in  
310 PRS-CS. We ran PRS-CS using both the grid model and automated optimization model (referred  
311 to as auto model), the former of which specifies a global shrinkage parameter ( $\phi$ , in which  
312 smaller values indicate less polygenic architecture and vice versa for larger values), with 1KG-  
313 EUR as the LD reference panel. We note that the optimized  $\phi$  parameter with highest prediction  
314 accuracy in the grid model differed among traits (**Figure S8**). Specifically, we found that for more  
315 polygenic traits (as estimated using SBayesS) including asthma, COPD and stroke (**Figure 2**),  
316 the optimal  $\phi$  parameter was  $1 \times 10^{-3}$  in EUR (**Figure S8**). There was no significant difference  
317 between prediction accuracy using the optimal grid model versus auto model (**Figure S8**), which  
318 suggests PRS-CS can learn the  $\phi$  parameter from discovery GWAS well when its sample size  
319 is considerably large. Therefore, we hereafter used the auto model because of its computational  
320 efficiency. Across target ancestral populations in the UKBB, PRS from EUR-based LD reference  
321 panels showed significantly higher or comparable prediction accuracies compared to PRS using  
322 other ancestry-based LD reference panels (**Figure S9-A**). This result suggests that it is  
323 reasonable to use a EUR-based LD reference panel in GBMI largely because EUR ancestry  
324 constitutes the largest proportion of GWAS participants (~76.4%). Note that we also compared  
325 the prediction accuracy of LD reference panels derived from UKBB-EUR, which has a much larger  
326 sample size, against 1KG-EUR and found no significant difference (**Figure S9-B**). These results  
327 suggest that PRS-CS is not sensitive to the sample size of the LD reference panel, which is  
328 consistent with previous findings<sup>27</sup>.

329  
330 We then compared the optimal prediction accuracy of P+T versus the PRS-CS auto model in the  
331 UKBB and BBJ and found that PRS-CS showed overall better prediction performance for traits  
332 with higher  $h_{SNP}^2$  but no or slight improvements for traits with lower  $h_{SNP}^2$  (**Figure 4**). Specifically,  
333 the highest significant improvement of PRS-CS relative to that of P+T in EUR was observed for  
334 HF, of 60.9%, followed by COPD (53.2%) and asthma (48.8%). Substantial increments were  
335 observed for HF (105.2%), COPD (102.5%) and asthma (60.9%) in EAS. 45.8% and 48.1%  
336 improvements were shown for asthma in CSA and AFR, respectively. P+T saw better prediction  
337 performance over PRS-CS for a few trait-ancestry comparisons, however, such improvement was  
338 not statistically significant. Compared with P+T, which requires tuning  $p$ -value thresholds and is

339 affected by variant-level quality controls such as  $N_{eff}$ , there is no need to tune prediction parameters  
340 using the PRS-CS auto model, thus reducing the computational burden.

341  
342 Overall, after examining 13 disease endpoints, these results favor the use of PRS-CS for  
343 developing PRS from multi-ancestry GWAS of primarily European samples, which is also  
344 consistent with previous findings that Bayesian methods generally show better prediction  
345 accuracy over P+T across a range of different traits<sup>9,27</sup>. The practical considerations about the  
346 two models, PRS-CS and P+T, used in this study, are shown in **Table S5**.

### 347 PRS accuracy is heterogeneous across ancestries and biobanks

348 For each of the participating biobanks, we used leave-one-out meta-analysis as the discovery  
349 GWAS to estimate the prediction performance of PRS in each biobank (see STAR Methods). The  
350 disease prevalence and effective sample size of each biobank is shown in **Figure S10**. Generally,  
351 the PRS prediction accuracy of different traits increased with larger  $h_{SNP}^2$  (**Figure 5 and Table**  
352 **S6**). For example, the average  $R^2$  on the liability scale across biobanks (hereafter denoted as  
353  $\overline{R_{liability}^2}$ , see STAR Methods) in EUR ranged from <1.0% for AcApp, appendectomy, stroke, UtC  
354 and IPF, 1.0% for HF, ~2.2% for COPD and ThC to 3.8% for gout and 4.6% for asthma. Notably,  
355 accuracy was sometimes heterogeneous across biobanks within the same ancestry for some  
356 traits. Specifically, the  $R_{liability}^2$  for asthma in ESTBB and BioVU was significantly lower than  
357  $\overline{R_{liability}^2}$ , which might be attributable to between-biobank differences such as recruitment  
358 strategy, phenotyping, disease prevalence, and environmental factors. The prediction accuracy  
359 was generally lower in non-European ancestries compared to European ancestries, especially in  
360 African ancestry, which is mostly consistent with previous findings<sup>28–30</sup> with a few exceptions. For  
361 example, we observed comparable prediction accuracy for gout in EAS relative to that in EUR,  
362 which could be reflected by large effective sample sizes and some gout-associated SNPs with  
363 large effects exhibiting higher allele frequencies in EAS (**Figure S1**). For example, the MAFs of  
364 gout top-associated SNP, rs4148157, were 0.073 in 1KG-EUR and 0.25 in 1KG-EAS,  
365 respectively, and the phenotypic variance explained by that SNP in EAS (8.3%) was more than  
366 twice as high as that in EUR (3.0%). The accuracy of PRS to predict asthma risks in AMR was  
367 found to be significantly higher than that in EUR, which could be due to the small sample size in  
368 AMR (**Table S6**). Thus, further validation is needed in larger AMR population cohorts.

369

370 The ability of PRS to stratify individuals with higher disease risks was also found to be  
371 heterogeneous across biobanks and ancestries as shown in **Figure 6** and **Table S7**. We showed  
372 that the PRS distribution across different biobanks slightly varied. Specifically, we calculated the  
373 absolute difference of median PRS in each decile for each endpoint between biobanks for cases  
374 and controls, separately, and found that the largest absolute differences were 0.06 and 0.21 for  
375 stroke controls and stroke cases, respectively (**Figure S11**). This justifies the comparison of odds  
376 ratios (ORs) in terms of relative risks. The ORs between the top 10% and bottom 10% were more  
377 heterogeneous between biobanks and also higher relative to other comparisons (e.g., top 10%  
378 vs middle and other strata). This is consistent with previous studies where OR reported between  
379 tails of the PRS distribution is generally inflated relative to those between top ranked PRS and  
380 general populations<sup>11</sup>. We measured the variation of OR between biobanks using the coefficient  
381 of variation of OR ( $\text{CoeffVar}_{\text{OR}}$ , see STAR Methods). The largest  $\text{CoeffVar}_{\text{OR}}$  in EUR was observed  
382 for ThC of 0.46 between top 10% and bottom 10% as compared to 0.27 and 0.23 for top 10% vs  
383 middle and other, respectively. We recapitulated the findings using  $R_{\text{liability}}^2$  that ORs were overall  
384 higher for traits with higher  $h_{\text{SNP}}^2$  and also higher in EUR than non-EUR ancestries, which is  
385 expected as the two accuracy metrics are interrelated. For example, the averaged ORs across  
386 biobanks weighted by the inverse variance in EUR (see STAR Methods) for gout were 4.6, 2.4  
387 and 2.2 for the top 10% vs bottom 10%, middle and other strata, separately. The corresponding  
388 estimates in EUR for stroke were 1.6, 1.3 and 1.3, respectively. Across ancestries, the average  
389 OR of asthma between the top 10% and bottom 10% ranged from 4.1 in EUR to 2.4 in AFR.

390

391 Overall, the predictive performance of PRS measured by  $R_{\text{liability}}^2$  and OR was found to be  
392 heterogeneous across ancestries. This heterogeneity was also presented across biobanks for  
393 traits such as asthma which is considered as a syndrome comprising heterogeneous diseases<sup>31</sup>.

## 394 GBMI facilitates improved PRS accuracy compared to previous studies

395 GBMI resources might be expected to improve prediction accuracy due to large sample sizes and  
396 the inclusion of diverse ancestries. To explore this, we compared the prediction accuracy  
397 achieved by GBMI versus previously published GWAS using the same pipeline to run PRS-CS.  
398 As shown in **Figure 7** and **Figure S12**, the accuracy improvements were most obvious for traits  
399 with larger  $h_{\text{SNP}}^2$  but there was no or slight improvement for traits with lower  $h_{\text{SNP}}^2$ . Specifically, we  
400 calculated the absolute improvement of GBMI relative to that using previously published GWAS  
401 and found that on average across biobanks, the largest improvements of  $\overline{R_{\text{liability}}^2}$  in EUR were

402 0.033 for asthma, 0.031 for gout, 0.019 for ThC and 0.017 for COPD, whilst the corresponding  
403 improvements of AUC on average ( $\overline{\text{AUC}}$ ) were 0.051, 0.078, 0.078 and 0.041, respectively.  
404 Substantial improvements were also observed for gout in EAS ( $\overline{R^2_{liability}}$ : 0.037,  $\overline{\text{AUC}}$ : 0.090), for  
405 asthma in CSA ( $\overline{R^2_{liability}}$ : 0.026,  $\overline{\text{AUC}}$ : 0.060), EAS ( $\overline{R^2_{liability}}$ : 0.017,  $\overline{\text{AUC}}$ : 0.047) and AFR  
406 ( $\overline{R^2_{liability}}$ : 0.009,  $\overline{\text{AUC}}$ : 0.034), and for ThC in EAS ( $\overline{R^2_{liability}}$ : 0.014,  $\overline{\text{AUC}}$ : 0.080) and AFR ( $\overline{R^2_{liability}}$ :  
407 0.016,  $\overline{\text{AUC}}$ : 0.108). However, PRS accuracy was significantly higher for published GWAS relative  
408 to the current GBMI for POAG in EUR and AFR, and COPD in the specific case of Lifelines  
409 biobank. We referred to the datasets included in the public GWAS of POAG and found that  
410 individuals from diverse datasets of EUR and AFR populations were also part of the discovery  
411 dataset, thus we cannot rule out the possibility of sample overlapping or relatedness between the  
412 discovery and target datasets for these populations. This suggests that the PRS evaluation may  
413 be biased upwards from the prior GWAS for POAG. Also, the phenotypes of POAG across  
414 different biobanks are likely more heterogeneous in GBMI than targeted case-control studies<sup>18,32</sup>.  
415 The meta-analysis of GBMI with International Glaucoma Genetics Consortium (IGGC) did not  
416 lead to substantially improved prediction performance<sup>32</sup>. Another concern might be the  
417 disproportional case/control ratio of POAG in GBMI, of ~27,000 cases and ~1.4M controls, thus  
418 POAG-related phenotypes with shared genetics in the controls or possible uncontrolled ancestry  
419 differences between cases and controls might confound the GBMI GWAS. A very high  
420 heterogeneity for phenotype definitions is also found for COPD, however this does not explain  
421 why one biobank alone presents this pattern; a specific environmental or population effect not  
422 considered in the broad analysis might affect this particular observation.

423

424 To boost statistical power, we can meta-analyze GBMI GWAS with other non-overlapping  
425 cohorts as shown in other GBMI working groups<sup>33–35</sup>. However, we should note that more  
426 heterogeneity might be introduced from different resources such as population structure and  
427 phenotype definitions, which we cannot control with summary statistics data and that could  
428 exacerbate the heterogeneous performance of PRS across target populations. On the other  
429 hand, GBMI is open to more cohorts and has been continuously working on integrating more  
430 datasets.

431

## 432 Discussion

433 The GBMI resource is notable in its collection of phenotypes studied and range of participating  
434 cohorts from multiple ancestry groups; it has therefore offered a unique opportunity to  
435 comprehensively evaluate and develop guidelines regarding the effects of multi-ancestry and  
436 heterogeneous GWAS discovery data, polygenicity, and PRS methods on prediction performance  
437 in diverse target cohorts. In this study, we have used the unique GBMI resource consisting of  
438 multi-ancestry GWAS for multiple disease endpoints with varying genetic architectures and  
439 prevalences across diverse populations to develop and evaluate PRS. Indeed, we found overall  
440 across a range of phenotypes and ancestries that using the large-scale meta-analysis from GBMI  
441 significantly improved PRS accuracy compared to previous studies with smaller sample sizes and  
442 less diverse cohorts. While some previous studies have benchmarked PRS methods and  
443 accuracies, most have been based on relatively homogeneous GWAS discovery cohorts or  
444 evaluated for specific phenotypes<sup>3,9,26,36</sup>. Even when assessing the portability of PRS across  
445 ancestries, most evaluations have included ancestrally diverse target cohorts but still relatively  
446 homogeneous discovery cohorts<sup>12,13,37</sup>. Thus, based on the results of our analyses using GBMI,  
447 we have provided additional lessons and guidelines for developing PRS with multi-ancestry  
448 discovery data for different endpoints (**Figure S13**). We have organized these best practices  
449 according to 1) characteristics of the discovery GWAS, 2) PRS model fitting, and 3) the target  
450 cohort.

451  
452 First, the GWAS discovery cohort provides the prerequisite input for polygenic score calculations  
453 and interpretation, namely how phenotypes are ascertained and in which populations, which  
454 SNPs to include, and which effect sizes will be used. We recommend that standard quality  
455 controls should be performed with more caution when considering multi-ancestry discovery  
456 GWAS. Specifically, we suggest filtering variants based on the per-variant effective sample size  
457 ( $N_{eff}$ ) and MAF as they show considerable heterogeneity across datasets and ancestries in our  
458 discovery GWAS. When we filtered out variants with extremely small  $N_{eff}$  in our P+T analyses,  
459 and in particular when using HapMap3 SNPs, PRS prediction performance improved. As noted  
460 in Zhou et al.<sup>19</sup>, the allele frequencies of variants in GBMI meta-analyzed GWAS were compared  
461 with those in gnomAD using Mahalanobis distance and flagged if they were three standard  
462 deviations away from the mean. We recommend computing such statistics and filtering with this  
463 information, or if infeasible, restricting to using only HapMap3 variants.

464

465 Given the significant improvements in PRS accuracy with GBMI discovery GWAS over previous  
466 studies with smaller sample sizes and less diversity, we recommend using the largest and most  
467 diverse GWAS discovery cohort available when constructing PRS, even if it matches the ancestry  
468 composition of the target cohort slightly less well than a smaller GWAS. Overall, traits with higher  
469 SNP-based heritability showed greater improvement compared to those with lower SNP-based  
470 heritability. This indicates that PRS performance will continually benefit from larger sample sizes  
471 and more diverse populations. However, further research is needed to understand more  
472 concretely how the composition of underrepresented populations, including specific ancestries  
473 and varying sample sizes, can be modeled alongside current Eurocentric GWAS to best facilitate  
474 PRS accuracy and generalizability.

475  
476 Second, when fitting PRS models, important choices include which PRS construction methods to  
477 use, how to fine-tune hyperparameters, and which LD reference panels to use. So far, PRS  
478 models that use GWAS summary statistics have been favored over those that use individual-level  
479 data due to their computational efficiency and data access restrictions. These models have been  
480 comprehensively reviewed recently<sup>10,38</sup>. In this study, we therefore explored the prediction  
481 performance of two widely used PRS construction methods, P+T and PRS-CS. We paired the  
482 results of these methods with prior knowledge of trait-specific genetic architecture estimates from  
483 SBayesS. The best predictor for P+T is often obtained by fine-tuning the  $p$ -value thresholds in a  
484 validation dataset, while other LD related parameters, such as LD  $r^2$  and LD window size, are  
485 usually arbitrarily specified. Here, we found that the prediction accuracy of P+T was much less  
486 sensitive to different LD-related parameters compared to various  $p$ -value thresholds. Moreover,  
487 the optimal  $p$ -value threshold varied across phenotypes, likely because of trait-specific genetic  
488 architecture, especially the degree of polygenicity measured by SBayesS. However, differences  
489 in discovery GWAS and target dataset such as sample sizes, phenotype definition, disease  
490 population prevalence and population characteristics could also contribute to this variation. When  
491 analyzing PRS-CS results, we validated a previous finding that the auto model, that does not  
492 require post-hoc tuning of the proportion of SNPs with non-zero effects ( $\phi$ ), showed similar  
493 prediction performance relative to the more computationally intensive grid model, which requires  
494 determining the optimal  $\phi$  parameter in an independent tuning cohort<sup>27</sup>.

495  
496 We also recommend using prior knowledge and empirical measurements of the genetic  
497 architecture of studied phenotypes to choose specific types of PRS models. In this study, we  
498 evaluated the effects of trait-specific genetic architecture on PRS performance using estimates

499 from SBayesS. Generally, traits with higher SNP-based heritability, such as asthma and gout,  
500 showed greater improvement with the GBMI discovery data compared to those with lower SNP-  
501 based heritability, such as acute appendicitis (AcApp). Trait-specific architecture affected both the  
502 choice of method and optimal hyper-parameters. For example, extremely polygenic traits are  
503 more suitable for an infinitesimal model or Bayesian models that are adaptive to the trait genetic  
504 architecture. The specific model hyper-parameters are also affected by trait genetic architecture.  
505 For example, the optimal  $p$ -value threshold of P+T might be more stringent for less polygenic  
506 traits but less stringent for highly polygenic traits.

507  
508 Another decision point in fitting PRS models is regarding which LD reference panel to use when  
509 multi-ancestry GWAS discovery and target populations are available. An in-sample LD reference  
510 panel that spans the full discovery cohort is optimal but rarely available. Here, we have shown  
511 that EUR-based LD reference panels can reasonably approximate the LD of GBMI GWAS.  
512 However, choosing LD reference panels that mirrors the ancestry composition of the discovery  
513 GWAS when in-sample LD reference panels are not available is ideal. For convenience, if one  
514 ancestry is dominant in the multi-ancestry GWAS, we suggest using that ancestry-matched  
515 reference panel. The attenuation ratio statistic estimated from LDSC can further be used as a  
516 measure to quantify the degree of LD mismatch between discovery GWAS and LD reference  
517 panels<sup>22</sup>. When ancestry proportions are relatively evenly distributed, we and others have found  
518 that using LD reference panels with ancestry proportions that match the discovery GWAS could  
519 provide better prediction performance especially for less polygenic traits with large effect variants  
520 (unpublished work), such as lipid traits<sup>39</sup>. We also found that prediction performance can be  
521 improved when using ancestry-matched tuning cohorts for PRS construction to fine-tune hyper-  
522 parameters and avoid overfitting, such as P+T and the PRS-CS grid models explored in this study.  
523 While other studies have also explored options such as pseudo-validation when no additional  
524 tuning cohort is available<sup>40,41</sup>

525  
526 Third, the practical considerations for target populations involved in PRS analyses are quite  
527 consistent between using homogenous GWAS and multi-ancestry GWAS. In this study, we used  
528 biobanks with various ancestry compositions and recruitment strategies as the target cohorts<sup>19</sup>.  
529 For example, BBJ, BioVU and MGI are hospital-based biobanks whereas others are population-  
530 based or have mixed enrollment strategies, which can impact phenotype precision or  
531 ascertainment bias and therefore heritability. UKBB, MGI and BioVU have diverse ancestries  
532 while others primarily consist of one ancestry (either European or East-Asian participants). The



533 performance of PRS in different target populations can also be affected by the ancestry  
534 proportions in the discovery GWAS and precision of phenotype definition aside from biobank-  
535 specific factors (e.g., environmental factors), which warrants further exploration. We therefore  
536 recommend considering those factors and reporting PRS distribution statistics (e.g., median PRS)  
537 and accuracy metrics when benchmarking the prediction performance between different PRS  
538 predictors. More reporting standards about PRS models have been well-documented in PGS  
539 Catalog<sup>36</sup>.

540

541 Related to the target cohorts, we also found that the prediction performance showed great  
542 heterogeneity across biobanks and ancestries. Because PRS are only intended to capture genetic  
543 factors, other considerations such as environmental exposures and demographic history may  
544 impact the predictive power of PRS within and across ancestries, with recommendations for how  
545 to model these alongside PRS an open question for future research and methods development.  
546 For example, we found that the  $R_{liability}^2$  in OHS was overall higher than in other biobanks, which  
547 may be attributed to the more complex relatedness structure in this founder population. Notably,  
548 the phenotype definitions, recruitment strategy and disease prevalence also vary to different  
549 extents across the biobanks studied here.

550

551 We note a few limitations in our study. First, we chose 1KG-EUR as the LD reference panel  
552 because data security practices often preclude the use of individual-level GWAS data across  
553 analytical teams. Although we have shown that the EUR-based LD reference panels can  
554 reasonably approximate the LD of GBMI GWAS studied here, it still could affect SNP effect size  
555 estimates and thus prediction performance. Further efforts are required to provide more  
556 appropriate LD reference panels. For example, utilizing the large-scale UKBB with individual-level  
557 genotypes to construct a panel with matched ancestry proportions to the discovery GWAS has  
558 been used in a recent study<sup>39</sup>. However, early explorations have shown that using proportional  
559 LD reference panels generally achieves similar prediction performance as using EUR-based  
560 reference panels when EUR is primarily dominant in the multi-ancestry GWAS (unpublished  
561 work). Also, sharing LD matrices from participating biobanks without accessing individual-level  
562 data would be another alternative to construct an in-sample LD matrix. On the other hand,  
563 individual-level based PRS construction methods across large-scale biobanks without relying on  
564 LD reference panels are also promising. Such methods could potentially benefit from secure  
565 large-scale GWAS across multiple datasets. For example, Blatt et al.<sup>42</sup> have used homomorphic  
566 encryption to establish a privacy-preserving framework to perform GWAS and decrypt the results

567 for sharing through a project coordinator. Second, we have focused on common SNPs,  
568 specifically HapMap3 SNPs for PRS-CS. As a result, information from rarer variants missing in  
569 the LD reference panel was not captured in other non-European ancestries, which may explain a  
570 small fraction of the loss of accuracy across populations. Third, although a harmonized analysis  
571 framework was developed for GBMI, such as phenotype definitions, ancestry assignments, and  
572 PRS construction, there remains a multitude of factors that may contribute to heterogeneous  
573 accuracy across both biobanks and ancestries. These include, but are not limited to, phenotype  
574 precision, cohort-level disease prevalence, and environmental factors. Last, we evaluated PRS  
575 predictive performance using multi-ancestry GWAS but comparisons with single-ancestry GWAS  
576 at sufficient scale would enable us to better understand the specific contributions of ancestry  
577 diversity and increasing sample size especially for under-represented ancestries, which also  
578 serves as a future direction.

579  
580 The GBMI resource constitutes remarkable progress in expanding the number of endpoints and  
581 ancestry groups studied, laying the groundwork for several future directions for exploration. For  
582 example, PRS construction methods that model GWAS summary statistics alongside LD  
583 information from multiple ancestries have shown promising accuracy improvements for some  
584 traits<sup>16,43</sup>, but statistical methods are insufficient for equitable accuracy without simultaneous  
585 progress in generating large-scale diverse data, as early investigation into one of these methods  
586 has yielded marginal improvement in both European and non-European ancestries for asthma in  
587 GBMI<sup>44</sup>. In addition to multi-ancestry GWAS, sex-stratified GWAS in GBMI also provides  
588 opportunities to explore the role of sex-specific effects as well as impacts from the sample size  
589 ratio of males/females on prediction performance of PRS across biobanks. Beyond genetic  
590 effects, biobank-specific risk factors and environmental exposures provide further opportunities  
591 to better understand the heterogeneity in PRS accuracy that we have identified across biobanks  
592 and ancestries<sup>45,46</sup>. This will be extremely important as previous work has shown that prediction  
593 performance differences between target cohorts are not likely to be reduced using various PRS  
594 construction methods<sup>9</sup>. Finally, extending these collaboration efforts to more biobanks in the  
595 future, particularly those including recently admixed populations, will bring more resolution into  
596 those effects that are biobank-specific and ancestry-specific. Studies in recently admixed  
597 populations show that GWAS power can be improved by utilizing local ancestry-specific SNP  
598 effect estimates and thus have the potential to benefit genetic prediction accuracy and  
599 generalizability, particularly for less polygenic traits<sup>47,48,49</sup>. Altogether, these initiatives hold great

600 promise for improving transferability of PRS across biobanks and ancestries by harnessing the  
601 phenotypic richness and diversity present in different biobanks.  
602

## 603 Acknowledgements

604 A.R.M is funded by the K99/R00MH117229. E.L. is funded by the Colciencias fellowship ed.783.  
605 S.N. was supported by Takeda Science Foundation. Y.O. was supported by JSPS KAKENHI  
606 (22H00476), and AMED (JP21gm4010006, JP22km0405211, JP22ek0410075,  
607 JP22km0405217, JP22ek0109594), JST Moonshot R&D (JPMJMS2021, JPMJMS2024),  
608 Takeda Science Foundation, and Bioinformatics Initiative of Osaka University Graduate School  
609 of Medicine, Osaka University. E.R.G. is supported by the National Institutes of Health (NIH)  
610 Awards R35HG010718, R01HG011138, R01GM140287, and NIH/NIA AG068026. V.L.F. was  
611 supported by the European Union's Horizon 2020 research and innovation programme under  
612 the Marie Skłodowska-Curie grant agreement No.675033 (EGRET plus). L. B. and B. B. receive  
613 support from the K.G. Jebsen Center for Genetic Epidemiology funded by Stiftelsen Kristian  
614 Gerhard Jebsen; Faculty of Medicine and Health Sciences, NTNU; The Liaison Committee for  
615 education, research and innovation in Central Norway; and the Joint Research Committee  
616 between St Olavs Hospital and the Faculty of Medicine and Health Sciences, NTNU. K.L. and  
617 R.M. were supported by the Estonian Research Council grant PUT (PRG687) and by  
618 INTERVENE - This project has received funding from the European Union's Horizon 2020  
619 research and innovation programme under grant agreement No 101016775. W.Z. was  
620 supported by the National Human Genome Research Institute of the National Institutes of  
621 Health under award number T32HG010464. The work of the contributing biobanks was  
622 supported by numerous grants from governmental and charitable bodies. The biobank specific  
623 acknowledgements and full author list for GBMI are included in the **Supplementary Notes**.

## 624 Author Contributions

625 Study design: A.M., J.H., Y.O., Y.W.  
626 Data collection/contribution: L.B., P.A., B.B., P.D., K.H., R.M., Y.M., S.S., J.U., C.W., N.J.C.,  
627 I.S., J.H.  
628 Data analysis: Y.W., S.N., E.L., S.K., K.T., K.L., M.K. W.Z., K.H.W, M.J.F., L.B., V.L.F, J.H.  
629 Writing: Y.W., S.N., E.L., Y.O., A.M., J.H

630 Revision: Y.W., S.N, E.L., K.T., W.Z., S.S., J.W.S., B.N.W., C.W., E.R.G., N.J.C., Y.O., A.M.,  
631 J.H.

## 632 Declaration of Interests

633 E.R.G. receives an honorarium from the journal Circulation Research of the American Heart  
634 Association as a member of the Editorial Board.

## 635 Figure Legends

636 **Figure 1. Overview of the study framework.**

637 **Figure 2. Genetic architecture of endpoints in GBMI.** We reported the estimates from  
638 using meta-analyzed GWAS from all ancestries (labeled as All ancestries) and European  
639 only (labeled as EUR), respectively. The phenotypes on the y-axis are ranked based on  
640 the SNP-based heritability estimates using meta-analysis from all ancestries. Note the  
641 SNP-based heritability estimates were transformed on the liability scale. The vertical  
642 dashed lines in each panel indicate the corresponding median estimates across 13  
643 endpoints. The results for hypertrophic or obstructive cardiomyopathy (HCM) are not  
644 presented. Abbreviations: Europeans (EUR), chronic obstructive pulmonary disease  
645 (COPD), heart failure (HF), acute appendicitis (AcApp), venous thromboembolism (VTE),  
646 primary open-angle glaucoma (POAG), uterine cancer (UtC), abdominal aortic aneurysm  
647 (AAA), idiopathic pulmonary fibrosis (IPF), thyroid cancer (ThC).

648 **Figure 3. Sample size heterogeneity affects PRS prediction accuracy for P+T. A)**  
649 the distribution of effective sample sizes ( $N_{eff}$ ) for asthma as a representative trait. **B)**  
650 predictive performance of P+T for European (EUR) samples in the UK Biobank (UKBB).  
651 The  $R^2$  for asthma is shown as a representative result. Full results are shown in **Figure**  
652 **S7 and Table S3. C)** the ratio of  $N_{eff}$  of EUR compared with  $N_{eff}$  of all samples for asthma.

653 **Figure 4. Prediction performance using P+T versus that using PRS-CS.** The  
654 phenotypes are ranked based on the SNP-based heritability as shown in **Figure 2**  
655 (indicated by the dashed line) estimates using all ancestries. Only trait-ancestry pairs with  
656 significant accuracies in both P+T and PRS-CS are presented. The prediction accuracy  
657 in P+T estimated in the test cohort based on the optimal  $p$ -value thresholds fine-tuned in  
658 the validation cohort. The auto model was used for PRS-CS. Abbreviations: Europeans  
659 (EUR), Admixed Americans (AMR), Middle Eastern (MID), Central and South Asians  
660 (CSA), East Asians (EAS) and Africans (AFR), chronic obstructive pulmonary disease  
661 (COPD), heart failure (HF), acute appendicitis (AcApp), venous thromboembolism (VTE),  
662 primary open-angle glaucoma (POAG), uterine cancer (UtC), abdominal aortic aneurysm  
663 (AAA), idiopathic pulmonary fibrosis (IPF), thyroid cancer (ThC).

664

665 **Figure 5. Prediction performance of PRS-CS across biobanks and ancestries.** The  
666 phenotypes on the y-axis were ranked by the SNP-based heritability using all ancestries  
667 as shown in **Figure 2**. Only the significant results were shown. Data for all trait-ancestry  
668 pairs in each biobank are provided in **Table S6**. Note that we removed the estimates in  
669 AMR and MID due to limited information as a result of small sample sizes. Abbreviations:  
670 Europeans (EUR), Admixed Americans (AMR), Middle Eastern (MID), Central and South  
671 Asians (CSA), East Asians (EAS) and Africans (AFR), chronic obstructive pulmonary  
672 disease (COPD), heart failure (HF), acute appendicitis (AcApp), venous  
673 thromboembolism (VTE), primary open-angle glaucoma (POAG), uterine cancer (UtC),  
674 abdominal aortic aneurysm (AAA), idiopathic pulmonary fibrosis (IPF), thyroid cancer  
675 (ThC).

676 **Figure 6. The odds ratio (OR) between different PRS strata for endpoints in GBMI.**  
677 The dashed line indicates OR=1. Only significant trait-ancestry specific OR was reported,  
678 with  $p$ -value < 0.05. The full results are shown in **Table S7**. The averaged OR was  
679 calculated using the inverse-variance weighted method (see STAR Methods). PRS was  
680 stratified into deciles with the first decile (bottom 10%) used as the referenced group. The  
681 phenotypes were ranked based on SNP-based heritability estimates using all ancestries  
682 (**see Figure 2**). Abbreviations: Europeans (EUR), Admixed Americans (AMR), Middle  
683 Eastern (MID), Central and South Asians (CSA), East Asians (EAS) and Africans (AFR),  
684 chronic obstructive pulmonary disease (COPD), heart failure (HF), acute appendicitis  
685 (AcApp), venous thromboembolism (VTE), primary open-angle glaucoma (POAG),  
686 uterine cancer (UtC), abdominal aortic aneurysm (AAA), idiopathic pulmonary fibrosis  
687 (IPF), thyroid cancer (ThC).

688 **Figure 7. The prediction performance and ancestry compositions of GBMI versus**  
689 **previously published GWAS.** A) The ancestry compositions of GBMI and referenced  
690 GWAS. The label for biobanks in the x-axis indicated the leave-one-out-biobank meta-  
691 analyzed GWAS in GBMI. The previously published GWAS was labeled as Referenced.  
692 B) The comparison of AUC between GBMI and referenced GWAS. The AUC was  
693 calculated by fitting PRS only. The phenotypes in A) were ranked based on the effective  
694 sample sizes from all ancestries. The phenotypes in B) were ranked by the SNP-based  
695 heritability estimates from all ancestries. Note that we removed the estimates in AMR and  
696 MID due to limited information as a result of small sample sizes. The full results are shown  
697 in Table S4. Abbreviations: Europeans (EUR), Admixed Americans (AMR), Middle  
698 Eastern (MID), Central and South Asians (CSA), East Asians (EAS) and Africans (AFR),  
699 chronic obstructive pulmonary disease (COPD), heart failure (HF), acute appendicitis  
700 (AcApp), venous thromboembolism (VTE), primary open-angle glaucoma (POAG),  
701 uterine cancer (UtC), abdominal aortic aneurysm (AAA), idiopathic pulmonary fibrosis  
702 (IPF), thyroid cancer (ThC).

703  
704

## 705 STAR Methods

### 706 Datasets and quality control

707 Discovery datasets: For each of 14 endpoints, we used GWAS summary statistics from both GBMI  
708 and public datasets with summary statistics available in GWAS Catalog if applicable (**Table S1**  
709 **and Table S2**) as the discovery dataset. We filtered out SNPs with ambiguous variants, tri- and  
710 multi-allelic variants and low imputation quality (imputation INFO score < 0.3). For the GBMI  
711 discovery datasets, leave-one-biobank-out meta-analysis using the inverse-variance weighted  
712 meta-analysis strategy was applied<sup>18</sup>.

713

714 Target datasets: We used 9 biobanks, i.e., BioBank Japan (BBJ)<sup>50</sup>, BioVU<sup>51</sup>, Lifelines<sup>52</sup>, UK Biobank  
715 (UKBB)<sup>53</sup>, Ontario Health Study (OHS)<sup>54</sup>, Estonian Biobank (ESTBB)<sup>55</sup>, FinnGen, Michigan  
716 Genomics Initiative (MGI)<sup>56</sup> and Trøndelag Health Study (HUNT)<sup>57</sup>, as the target datasets, which  
717 were independent from the datasets included in the discovery GWAS. Brief descriptions about

718 these biobanks can be found in Zhou et al.<sup>18</sup>. We removed individuals with genetic relatedness  
719 larger than 0.05 and applied the same filters as the discovery GWAS for SNPs. In addition, only  
720 common SNPs with MAF > 1% were retained.

## 721 Genetic architecture of 14 endpoints in GBMI

722 SBayesS is a summary-level based method utilizing a Bayesian mixed linear model, which can  
723 report key parameters describing the genetic architecture of complex traits<sup>20</sup>. It only requires  
724 GWAS summary statistics and LD correlation matrix estimated from a reference panel. We ran  
725 SBayesS using the GWAS summary statistics from all 14 endpoints in GBMI, including meta-  
726 analyses on all ancestries and on EUR only in 19 biobanks<sup>18</sup>. We evaluated the SNP-based  
727 heritability ( $h_{SNP}^2$ ), polygenicity (proportion of SNPs with nonzero effects) and the relationship  
728 between allele frequency and SNP effects (S). We used the shrunk LD matrix (i.e., a LD matrix  
729 ignoring small LD correlations due to sampling variance) on HapMap3 SNPs provided by GCTB  
730 software. The LD matrix was constructed based on 50K European individuals from UKBB. Note  
731 that we observed inflated SNP-based heritability estimates using effective sample size for each  
732 SNP and hence used the total GWAS sample size instead. We used other default settings in the  
733 software. We calculated the  $p$ -value of each parameter using Wald test to evaluate whether it was  
734 significantly different from 0. The  $h_{SNP}^2$  was further transformed into liability-scale with disease  
735 prevalence approximated as the case proportions in the GWAS summary statistics<sup>58</sup>.

## 736 PRS construction

737 P+T: P+T is used to clump quasi-independent trait-associated loci within a LD window size using  
738 a specific LD  $r^2$  threshold. We first ran P+T in the UKBB and BBJ using a LD  $r^2$  threshold of 0.1  
739 and a LD window ( $LD_{win}$ ) of 250Kb. We performed the analysis on both HapMap3 SNPs and  
740 genome-wide SNPs. We constructed PRS using `--score` implemented in Plink v1.9<sup>59</sup> using 13  
741 different  $p$ -value thresholds ( $5 \times 10^{-8}$ ,  $5 \times 10^{-7}$ ,  $1 \times 10^{-6}$ ,  $5 \times 10^{-6}$ ,  $5 \times 10^{-5}$ ,  $5 \times 10^{-4}$ ,  $5 \times 10^{-3}$ , 0.01,  
742 0.05, 0.1, 0.2, 0.5, 1). We further explored how per-variant filtering based on effective sample  
743 sizes ( $N_{eff}$ ) and MAF thresholds would affect the prediction performance. We used three  
744 thresholds to retain variants by their  $N_{eff}$ : >0%, >50%, and >80% of  $N_{eff}$  compared to the total ones  
745 and also three MAF filters: 0.01, 0.05 and 0.1. In the UKBB, we also explored the impact of  
746 optimizing LD parameters on prediction performance by using different combinations of  $LD_{win}$   
747 (250, 500, 1000, and 2000Kb) and LD  $r^2$  thresholds (0.01, 0.02, 0.05, 0.1, 0.2, and 0.05) with the  
748 following flags: `--clump-p1 1 --clump-p2 1 --clump-r2  $LD_{win}$  --clump-kb  $r^2$`  in Plink v1.9. For each



749 population in the specific biobank, we randomly split the individuals into two even parts. One part  
750 was used as a validation cohort to fine-tune the parameters and the other part was used as the  
751 test cohort to evaluate the performance of PRS. To explore the impact of tuning cohorts on target  
752 populations with diverse ancestries such as UKBB in this study, we also used 10,000 EUR  
753 samples, not included in the discovery GWAS and independent from the test cohort, as the tuning  
754 cohort.

755  
756 PRS-CS: PRS-CS<sup>27</sup> is a Bayesian regression framework which enables continuous shrinkage  
757 priors on SNP effects to infer their posterior mean effects. We ran PRS-CS using both the grid  
758 and auto models in the UKBB. In the grid model, we used a series of global shrinkage parameters  
759 ( $\phi = 1 \times 10^{-6}, 1 \times 10^{-5}, 1 \times 10^{-4}, 1 \times 10^{-3}, 0.01, 0.1, 1$ ), with lower  $\phi$  values suggesting less  
760 polygenic genetic architecture and vice versa for more polygenic genetic architecture. For the  
761 auto model, PRS-CS will learn the  $\phi$  parameter from the discovery GWAS without requiring  
762 post-hoc tuning. We used both total GWAS sample size and effective sample size as input for  
763 PRS-CS and found little difference, suggesting that PRS-CS is insensitive to the input of GWAS  
764 sample size. We hence used the effective sample size for subsequent analyses in this study. We  
765 used the default settings for other parameters. We generalized the auto model for all endpoints  
766 in both UKBB and BBJ. When comparing the two models, we selected the optimal  $\phi$  parameter  
767 from the grid model based on the highest prediction accuracy in the target population.

## 768 LD reference panel

769 Both P+T and PRS-CS are summary-level based PRS prediction methods, utilizing GWAS  
770 summary statistics and an LD reference panel. To explore the impact of LD reference panels on  
771 prediction performance, we used LD reference panels of different ancestral compositions, varying  
772 sample sizes and SNP density. Specifically, we used four global ancestry groups, i.e., European  
773 (EUR), South-Asian (SAS), East-Asian (EAS) and African (AFR), from 1000G Phase 3 (1KG) as  
774 LD reference panels for P+T. Further, we randomly sampled a subset of individuals with sample  
775 sizes of 500, 5000, 10,000 and 50,000 from UKBB-EUR to analyze how the sample sizes of LD  
776 reference panel would affect prediction accuracy for P+T. Moreover, we ran P+T on both the  
777 HapMap3 SNP set and a denser SNP set with genome-wide SNPs. We ran PRS-CS with the LD  
778 matrix provided by PRS-CS software<sup>27</sup>, which are based on both 1KG and UKBB populations from  
779 those four ancestry groups and Admixed American population (AMR). We performed those  
780 analyses using leave-UKBB-out GWAS in GBMI and evaluated the prediction performance in  
781 diverse ancestry groups in the UKBB.

782

783 To explore how well EUR-based LD reference approximated the LD of multi-ancestry GWAS in  
784 GBMI, we ran LD score regression (LDSC) to estimate the attenuation ratio statistic<sup>21</sup>. The values  
785 of attenuation ratio larger than 0.2 suggest a strong LD mismatch between GWAS summary  
786 statistics and LD reference panel. We performed LDSC analyses on different GWAS, including  
787 GBMI GWAS from meta-analyses on all ancestries, EUR only and leave-one-biobank-out.

## 788 Evaluation of prediction performance

789 After constructing PRS, we evaluated the prediction performance in the independent target  
790 datasets. We used a logistic regression to calculate the Nagelkerke's  $R^2$  and variance on the  
791 liability-scale explained by PRS as described previously<sup>58</sup>. Area under the receiver operating  
792 characteristic curve (AUC) was also reported for full models with additional covariates and models  
793 including PRS only. We used bootstrap with 1000 replicates to estimate their corresponding 95%  
794 confidence intervals (CIs). Note that the proportion of cases in each ancestry in the target dataset  
795 was approximated as the disease population prevalence. The same covariates (usually age, sex  
796 and 20 genotypic principal components, PCs) used in the GWAS analyses were included in the  
797 full regression model as phenotype  $\sim$  PRS + covariates. We also calculated the average  $R^2$  on  
798 the liability scale and AUC across biobanks (denoted as  $\overline{R^2_{liability}}$  and  $\overline{AUC}$ , respectively) in each  
799 ancestry by weighting the effective sample size of each biobank for each endpoint. Further, we  
800 divided the target individuals into deciles based on the ranking of PRS distribution. We compared  
801 the odds ratio (OR) of the top decile relative to those ranked as the bottom, the middle and the  
802 remaining, when using the first decile as the referenced group. For endpoints presented in two or  
803 more biobanks, we calculated the averaged OR using the inverse variance weighted method and  
804 the coefficient of variation of OR (CoeffVar<sub>OR</sub>) as SD(OR)/mean(OR).

## 805 Resource Availability

### 806 Data and Code Availability

807 The all-biobank and ancestry-specific GWAS summary statistics are publicly available for  
808 downloading at <https://www.globalbiobankmeta.org/resources> and browsed at the PheWeb  
809 Browser <http://results.globalbiobankmeta.org/>. The PRS weights re-estimated using PRC-CS-  
810 auto for multi-ancestry GWAS including all biobanks and leave-UKBB-out multi-ancestry GWAS  
811 have been uploaded to PGS Catalog (<https://www.pgscatalog.org/>) under the study ID  
812 PGP000262. 1000 Genome Phase 3 data can be accessed at  
813 [ftp://ftp.1000genomes.ebi.ac.uk/vol1/ftp/data\\_collections/1000\\_genomes\\_project/data](ftp://ftp.1000genomes.ebi.ac.uk/vol1/ftp/data_collections/1000_genomes_project/data). We used

814 UKB data via application 31063. The software used in this study can be found at: Plink  
815 (<https://www.cog-genomics.org/plink/>), PRS-CS (<https://github.com/getian107/PRScs>),  
816 SBayesS/GCTB (<https://cns.genomics.com/software/gctb/>). The codes used in this study can be  
817 found in the github repository: <https://github.com/globalbiobankmeta/PRS>.  
818  
819

## 820 References

- 821 1. Abul-Husn NS, Kenny EE. Personalized Medicine and the Power of Electronic Health  
822 Records. *Cell*. 2019 Mar 21;177(1):58–69.
- 823 2. Inouye M, Abraham G, Nelson CP, Wood AM, Sweeting MJ, Dudbridge F, et al. Genomic  
824 Risk Prediction of Coronary Artery Disease in 480,000 Adults: Implications for Primary  
825 Prevention. *J Am Coll Cardiol*. 2018 Oct 16;72(16):1883–93.
- 826 3. Torkamani A, Wineinger NE, Topol EJ. The personal and clinical utility of polygenic risk  
827 scores. *Nat Rev Genet*. 2018 Sep;19(9):581–90.
- 828 4. Lewis CM, Vassos E. Polygenic risk scores: from research tools to clinical instruments.  
829 *Genome Med*. 2020 May 18;12(1):44.
- 830 5. Mavaddat N, Michailidou K, Dennis J, Lush M, Fachal L, Lee A, et al. Polygenic Risk  
831 Scores for Prediction of Breast Cancer and Breast Cancer Subtypes. *Am J Hum Genet*.  
832 2019 Jan 3;104(1):21–34.
- 833 6. Landi I, Kaji DA, Cotter L, Van Vleck T, Belbin G, Preuss M, et al. Prognostic value of  
834 polygenic risk scores for adults with psychosis. *Nat Med*. 2021 Sep 6;1–6.
- 835 7. Dudbridge F, Pashayan N, Yang J. Predictive accuracy of combined genetic and  
836 environmental risk scores. *Genet Epidemiol*. 2018 Feb;42(1):4–19.
- 837 8. Craig JE, Han X, Qassim A, Hassall M, Cooke Bailey JN, Kinzy TG, et al. Multitrait analysis  
838 of glaucoma identifies new risk loci and enables polygenic prediction of disease  
839 susceptibility and progression. *Nat Genet*. 2020 Jan 20;52(2):160–6.
- 840 9. Ni G, Zeng J, Revez JA, Wang Y, Zheng Z, Ge T, et al. A Comparison of Ten Polygenic  
841 Score Methods for Psychiatric Disorders Applied Across Multiple Cohorts. *Biol Psychiatry*.  
842 2021 Nov 1;90(9):611–20.
- 843 10. Ma Y, Zhou X. Genetic prediction of complex traits with polygenic scores: a statistical  
844 review. *Trends Genet*. 2021 Nov;37(11):995–1011.
- 845 11. Kulm S, Marderstein A, Mezey J. A systematic framework for assessing the clinical impact  
846 of polygenic risk scores [Internet]. *MedRxiv*. 2021. Available from:  
847 <https://www.medrxiv.org/content/10.1101/2020.04.06.20055574v2.full-text>
- 848 12. Majara L, Kalungi A, Koen N, Zar H, Stein DJ, Kinyanda E, et al. Low generalizability of  
849 polygenic scores in African populations due to genetic and environmental diversity  
850 [Internet]. Cold Spring Harbor Laboratory. 2021 [cited 2021 Jan 28]. p. 2021.01.12.426453.

- 851 Available from: <https://www.biorxiv.org/content/10.1101/2021.01.12.426453v1.abstract>
- 852 13. Martin AR, Kanai M, Kamatani Y, Okada Y, Neale BM, Daly MJ. Clinical use of current  
853 polygenic risk scores may exacerbate health disparities. *Nat Genet.* 2019 Apr;51(4):584–  
854 91.
- 855 14. Mostafavi H, Harpak A, Agarwal I, Conley D, Pritchard JK, Przeworski M. Variable  
856 prediction accuracy of polygenic scores within an ancestry group. *Elife.* 2020 Jan  
857 30;9:e48376.
- 858 15. Martin AR, Daly MJ, Robinson EB, Hyman SE, Neale BM. Predicting Polygenic Risk of  
859 Psychiatric Disorders. *Biol Psychiatry.* 2019 Jul 15;86(2):97–109.
- 860 16. Ruan Y, Anne Feng YC, Chen CY, Lam M, Sawa A, Martin AR, et al. Improving polygenic  
861 prediction in ancestrally diverse populations [Internet]. *medRxiv.* 2021. Available from:  
862 <http://medrxiv.org/lookup/doi/10.1101/2020.12.27.20248738>
- 863 17. Weissbrod O, Kanai M, Shi H, Gazal S, Peyrot W, Khara A, et al. Leveraging fine-mapping  
864 and non-European training data to improve trans-ethnic polygenic risk scores [Internet].  
865 *medRxiv.* 2021. Available from:  
866 <http://medrxiv.org/lookup/doi/10.1101/2021.01.19.21249483>
- 867 18. Zhou W, Kanai M, Wu KHH, Humaira R, Tsuo K, Hirbo JB, et al. Global Biobank Meta-  
868 analysis Initiative: powering genetic discovery across human diseases [Internet]. *medRxiv.*  
869 2021. Available from: <http://medrxiv.org/lookup/doi/10.1101/2021.11.19.21266436>
- 870 19. Zhou W, Kanai M, Wu KHH, Humaira R, Tsuo K, Hirbo JB, et al. Global Biobank Meta-  
871 analysis Initiative: powering genetic discovery across human diseases [Internet]. *MedRxiv.*  
872 2021. Available from: <http://medrxiv.org/lookup/doi/10.1101/2021.11.19.21266436>
- 873 20. Zeng J, Xue A, Jiang L, Lloyd-Jones LR, Wu Y, Wang H, et al. Widespread signatures of  
874 natural selection across human complex traits and functional genomic categories. *Nat*  
875 *Commun.* 2021 Feb 19;12(1):1164.
- 876 21. Bulik-Sullivan BK, Loh PR, Finucane HK, Ripke S, Yang J, Schizophrenia Working Group  
877 of the Psychiatric Genomics Consortium, et al. LD Score regression distinguishes  
878 confounding from polygenicity in genome-wide association studies. *Nat Genet.* 2015  
879 Mar;47(3):291–5.
- 880 22. Yengo L, Vedantam S, Marouli E, Sidorenko J, Bartell E, Sakaue S, et al. A Saturated Map  
881 of Common Genetic Variants Associated with Human Height from 5.4 Million Individuals of  
882 Diverse Ancestries [Internet]. *bioRxiv.* 2022 [cited 2022 Jan 11]. p. 2022.01.07.475305.  
883 Available from: <https://www.biorxiv.org/content/10.1101/2022.01.07.475305v1?rss=1>
- 884 23. O'Connor LJ, Schoech AP, Hormozdiari F, Gazal S, Patterson N, Price AL. Extreme  
885 Polygenicity of Complex Traits Is Explained by Negative Selection. *Am J Hum Genet.* 2019  
886 Sep 5;105(3):456–76.
- 887 24. Zhang Y, Qi G, Park JH, Chatterjee N. Estimation of complex effect-size distributions using  
888 summary-level statistics from genome-wide association studies across 32 complex traits.  
889 *Nat Genet.* 2018 Sep;50(9):1318–26.

- 890 25. Ware EB, Schmitz LL, Faul J, Gard A, Mitchell C, Smith JA, et al. Heterogeneity in  
891 polygenic scores for common human traits [Internet]. bioRxiv. 2017. p. 106062. Available  
892 from: <https://www.biorxiv.org/content/10.1101/106062v1>
- 893 26. Choi SW, Mak TSH, O'Reilly PF. Tutorial: a guide to performing polygenic risk score  
894 analyses. Nat Protoc [Internet]. 2020 Jul 24; Available from:  
895 <http://dx.doi.org/10.1038/s41596-020-0353-1>
- 896 27. Ge T, Chen CY, Ni Y, Feng YCA, Smoller JW. Polygenic prediction via Bayesian regression  
897 and continuous shrinkage priors. Nat Commun. 2019 Apr 16;10(1):1776.
- 898 28. Martin AR, Gignoux CR, Walters RK, Wojcik GL, Neale BM, Gravel S, et al. Human  
899 Demographic History Impacts Genetic Risk Prediction across Diverse Populations. Am J  
900 Hum Genet. 2017 Apr 6;100(4):635–49.
- 901 29. Duncan L, Shen H, Gelaye B, Meijssen J, Ressler K, Feldman M, et al. Analysis of polygenic  
902 risk score usage and performance in diverse human populations. Nat Commun. 2019 Jul  
903 25;10(1):1–9.
- 904 30. Wang Y, Guo J, Ni G, Yang J, Visscher PM, Yengo L. Theoretical and empirical  
905 quantification of the accuracy of polygenic scores in ancestry divergent populations. Nat  
906 Commun. 2020 Jul 31;11(1):3865.
- 907 31. Borish L, Culp JA. Asthma: a syndrome composed of heterogeneous diseases. Ann Allergy  
908 Asthma Immunol. 2008 Jul;101(1):1–8; quiz 8–11, 50.
- 909 32. Lo Faro, Bhattacharya, Zhou, Zhou, Wang, Läll, et al. Global Biobank Meta-Analysis  
910 Initiative: A genome-wide association meta-analysis identifies novel primary open-angle  
911 glaucoma loci and shared biology with vascular mechanisms and cell proliferation. In  
912 preparation. 2021;
- 913 33. Faro VL, Bhattacharya A, Zhou W, Zhou D, Wang Y, Läll K, et al. Genome-wide association  
914 meta-analysis identifies novel ancestry-specific primary open-angle glaucoma loci and  
915 shared biology with vascular mechanisms and cell proliferation [Internet]. medRxiv. 2021.  
916 Available from: <https://www.medrxiv.org/content/10.1101/2021.12.16.21267891.abstract>
- 917 34. Surakka I, Wu KH, Hornsby W, Wolford BN, Shen F, Zhou W, et al. Multi-ancestry meta-  
918 analysis identifies 2 novel loci associated with ischemic stroke and reveals heterogeneity of  
919 effects between sexes and ancestries [Internet]. bioRxiv. 2022. Available from:  
920 <https://www.medrxiv.org/content/10.1101/2022.02.28.22271647.abstract>
- 921 35. Partanen JJ, Häppölä P, Zhou W, Lehisto AA, Ainola M, Sutinen E, et al. Leveraging global  
922 multi-ancestry meta-analysis in the study of Idiopathic Pulmonary Fibrosis genetics  
923 [Internet]. bioRxiv. 2021. Available from:  
924 <https://www.medrxiv.org/content/10.1101/2021.12.29.21268310.abstract>
- 925 36. Wand H, Lambert SA, Tamburro C, Iacocca MA, O'Sullivan JW, Sillari C, et al. Improving  
926 reporting standards for polygenic scores in risk prediction studies. Nature. 2021  
927 Mar;591(7849):211–9.
- 928 37. Privé F, Aschard H, Carmi S, Folkersen L, Hoggart C, O'Reilly PF, et al. Portability of 245  
929 polygenic scores when derived from the UK Biobank and applied to 9 ancestry groups from

- 930 the same cohort. *Am J Hum Genet.* 2022 Feb 3;109(2):373.
- 931 38. Wang Y, Tsuo K, Kanai M, Neale BM, Martin AR. Challenges and Opportunities for  
932 Developing More Generalizable Polygenic Risk Scores. *Annu Rev Biomed Data Sci*  
933 [Internet]. 2022 May 16; Available from: [http://dx.doi.org/10.1146/annurev-biodatasci-](http://dx.doi.org/10.1146/annurev-biodatasci-111721-074830)  
934 [111721-074830](http://dx.doi.org/10.1146/annurev-biodatasci-111721-074830)
- 935 39. Graham SE, Clarke SL, Wu KH, Lin K, Millwood IY, Mahajan A, et al. The power of genetic  
936 diversity in genome-wide association studies of lipids. *Nature* [Internet]. 2021 [cited 2021  
937 Dec 10]; Available from: [https://ora.ox.ac.uk/objects/uuid:5d0c9801-0dbf-4d5d-8d19-](https://ora.ox.ac.uk/objects/uuid:5d0c9801-0dbf-4d5d-8d19-95606c30a2c0)  
938 [95606c30a2c0](https://ora.ox.ac.uk/objects/uuid:5d0c9801-0dbf-4d5d-8d19-95606c30a2c0)
- 939 40. Mak TSH, Porsch RM, Choi SW, Zhou X, Sham PC. Polygenic scores via penalized  
940 regression on summary statistics. *Genet Epidemiol.* 2017 Sep;41(6):469–80.
- 941 41. Miao J, Guo H, Song G, Zhao Z, Hou L, Lu Q. Quantifying portable genetic effects and  
942 improving cross-ancestry genetic prediction with GWAS summary statistics [Internet].  
943 bioRxiv. 2022 [cited 2022 Jun 17]. p. 2022.05.26.493528. Available from:  
944 <https://www.biorxiv.org/content/10.1101/2022.05.26.493528v1>
- 945 42. Blatt M, Gusev A, Polyakov Y, Goldwasser S. Secure large-scale genome-wide association  
946 studies using homomorphic encryption. *Proc Natl Acad Sci U S A.* 2020 May  
947 26;117(21):11608–13.
- 948 43. Márquez-Luna C, Loh PR, South Asian Type 2 Diabetes (SAT2D) Consortium, SIGMA  
949 Type 2 Diabetes Consortium, Price AL. Multiethnic polygenic risk scores improve risk  
950 prediction in diverse populations. *Genet Epidemiol.* 2017 Dec;41(8):811–23.
- 951 44. Tsuo, Zhou, Wang, Kanai, Namba, Gupta, et al. Multi-ancestry meta-analysis of asthma  
952 identifies novel associations and highlights shared genetic architecture across biobanks  
953 and traits. In preparation. 2021;
- 954 45. Meisner A, Kundu P, Chatterjee N. Case-Only Analysis of Gene-Environment Interactions  
955 Using Polygenic Risk Scores. *Am J Epidemiol.* 2019 Nov 1;188(11):2013–20.
- 956 46. Loika Y, Irincheeva I, Culminkaya I, Nazarian A, Kulminski AM. Polygenic risk scores:  
957 pleiotropy and the effect of environment. *Geroscience.* 2020 Dec;42(6):1635–47.
- 958 47. Atkinson EG, Maihofer AX, Kanai M, Martin AR, Karczewski KJ, Santoro ML, et al. Tractor  
959 uses local ancestry to enable the inclusion of admixed individuals in GWAS and to boost  
960 power. *Nat Genet.* 2021 Feb;53(2):195–204.
- 961 48. Cavazos TB, Witte JS. Inclusion of variants discovered from diverse populations improves  
962 polygenic risk score transferability. *Human Genetics and Genomics Advances.* 2021 Jan  
963 14;2(1):100017.
- 964 49. Marnetto D, Pärna K, Läll K, Molinaro L, Montinaro F, Haller T, et al. Ancestry  
965 deconvolution and partial polygenic score can improve susceptibility predictions in recently  
966 admixed individuals. *Nat Commun.* 2020 Apr 2;11(1):1–9.
- 967 50. Nagai A, Hirata M, Kamatani Y, Muto K, Matsuda K, Kiyohara Y, et al. Overview of the  
968 BioBank Japan Project: Study design and profile. *J Epidemiol.* 2017 Mar;27(3S):S2–8.

- 969 51. Bowton EA, Collier SP, Wang X, Sutcliffe CB, Van Driest SL, Couch LJ, et al. Phenotype-  
970 Driven Plasma Biobanking Strategies and Methods. *J Pers Med*. 2015 May 14;5(2):140–52.
- 971 52. Scholtens S, Smidt N, Swertz MA, Bakker SJL, Dotinga A, Vonk JM, et al. Cohort Profile:  
972 LifeLines, a three-generation cohort study and biobank. *Int J Epidemiol*. 2015  
973 Aug;44(4):1172–80.
- 974 53. Bycroft C, Freeman C, Petkova D, Band G, Elliott LT, Sharp K, et al. The UK Biobank  
975 resource with deep phenotyping and genomic data. *Nature*. 2018 Oct 10;562(7726):203–9.
- 976 54. Dummer TJB, Awadalla P, Boileau C, Craig C, Fortier I, Goel V, et al. The Canadian  
977 Partnership for Tomorrow Project: a pan-Canadian platform for research on chronic disease  
978 prevention. *CMAJ*. 2018 Jun 11;190(23):E710–7.
- 979 55. Leitsalu L, Haller T, Esko T, Tammesoo ML, Alavere H, Snieder H, et al. Cohort Profile:  
980 Estonian Biobank of the Estonian Genome Center, University of Tartu. *Int J Epidemiol*.  
981 2015 Aug;44(4):1137–47.
- 982 56. Zawistowski, Fritsche, Pandit, Vanderwerff, Patil, Schmidt, et al. The Michigan Genomics  
983 Initiative: a biobank linking genotypes and electronic clinical records in Michigan Medicine  
984 patients. In preparation. 2021;
- 985 57. Krokstad S, Langhammer A, Hveem K, Holmen TL, Midthjell K, Stene TR, et al. Cohort  
986 Profile: the HUNT Study, Norway. *Int J Epidemiol*. 2013 Aug;42(4):968–77.
- 987 58. Lee SH, Goddard ME, Wray NR, Visscher PM. A better coefficient of determination for  
988 genetic profile analysis. *Genet Epidemiol*. 2012 Apr;36(3):214–24.
- 989 59. Chang CC, Chow CC, Tellier LC, Vattikuti S, Purcell SM, Lee JJ. Second-generation  
990 PLINK: rising to the challenge of larger and richer datasets. *Gigascience*. 2015 Feb 25;4:7.
- 991

## Figure list

|                                                                                                               |   |
|---------------------------------------------------------------------------------------------------------------|---|
| Figure 1. Overview of the study framework .....                                                               | 2 |
| Figure 2. Genetic architecture of endpoints in GBMI. ....                                                     | 3 |
| Figure 3. Sample size heterogeneity affects PRS prediction accuracy for P+T. ....                             | 4 |
| Figure 4. Prediction performance using P+T versus that using PRS-CS.....                                      | 5 |
| Figure 5. Prediction performance of PRS-CS across biobanks and ancestries.....                                | 6 |
| Figure 6. The odds ratio (OR) between different PRS strata for endpoints in GBMI. ....                        | 7 |
| Figure 7. The prediction performance and ancestry compositions of GBMI versus previously published GWAS. .... | 8 |



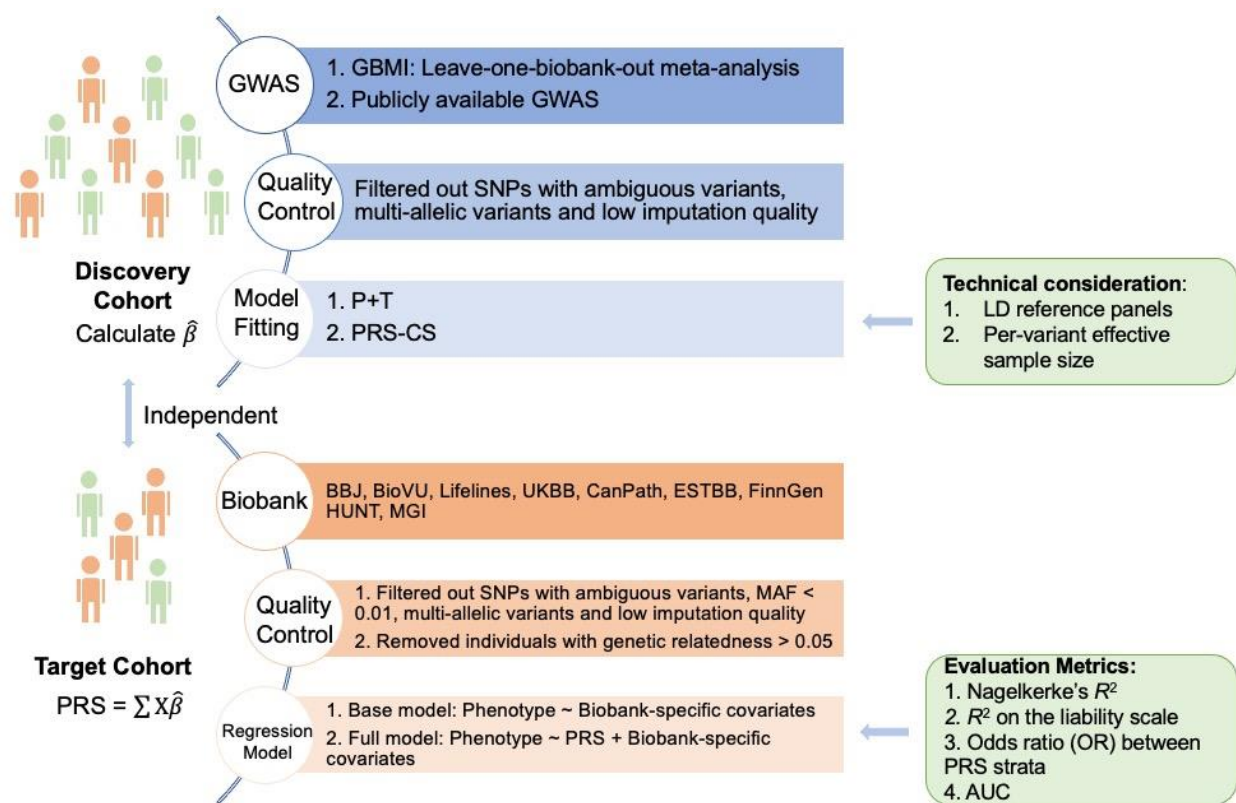

Figure 1. Overview of the study framework.

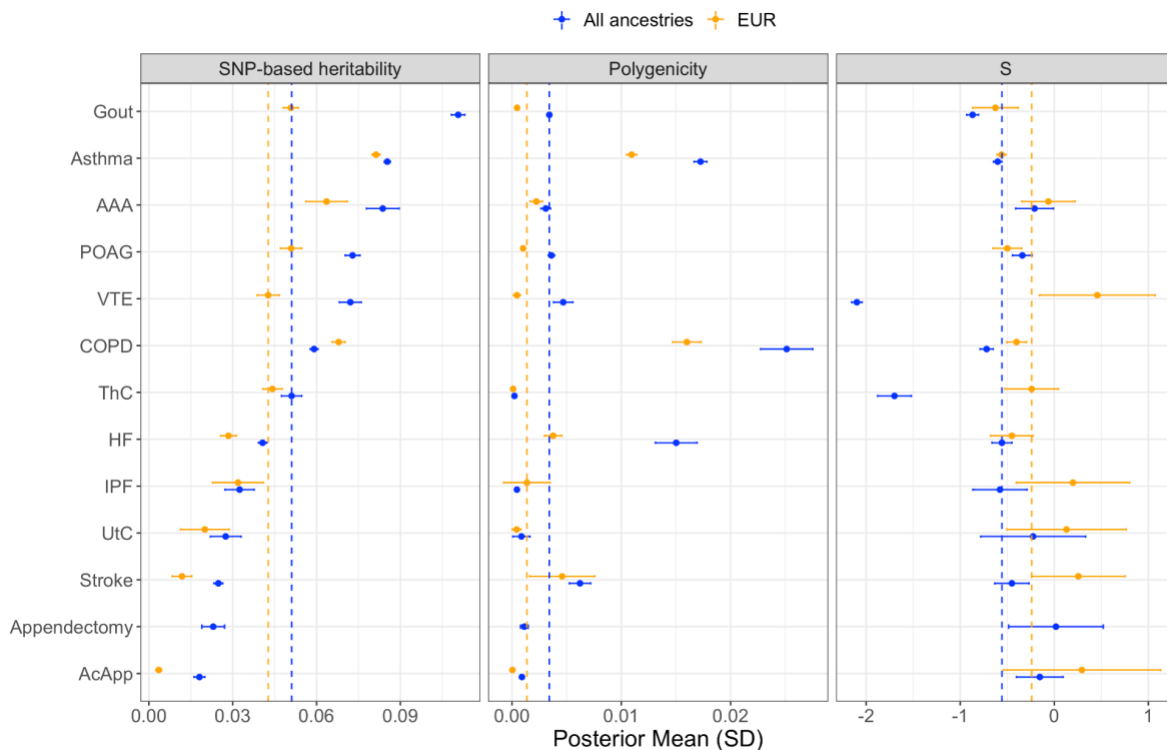

**Figure 2. Genetic architecture of endpoints in GBMI.**

We reported the estimates from using meta-analyzed GWAS from all ancestries (labeled as All ancestries) and European only (labeled as EUR), respectively. The phenotypes on the y-axis are ranked based on the SNP-based heritability estimates using meta-analysis from all ancestries. Note the SNP-based heritability estimates were transformed on the liability scale. The vertical dashed lines in each panel indicate the corresponding median estimates across 13 endpoints. The results for hypertrophic or obstructive cardiomyopathy (HCM) are not presented. Abbreviations: Europeans (EUR), chronic obstructive pulmonary disease (COPD), heart failure (HF), acute appendicitis (AcApp), venous thromboembolism (VTE), primary open-angle glaucoma (POAG), uterine cancer (UtC), abdominal aortic aneurysm (AAA), idiopathic pulmonary fibrosis (IPF), thyroid cancer (ThC).

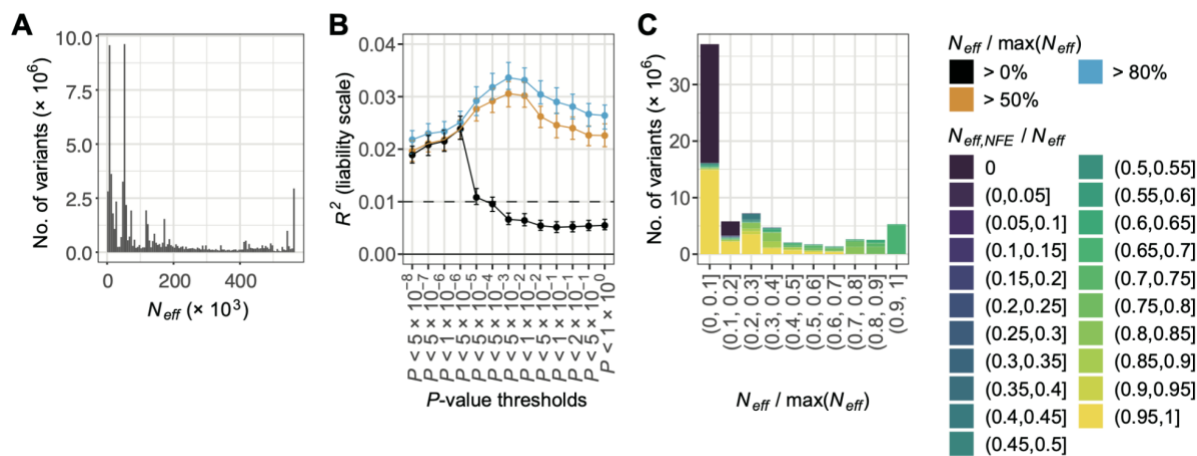

**Figure 3. Sample size heterogeneity affects PRS prediction accuracy for P+T.**

A) the distribution of effective sample sizes ( $N_{eff}$ ) for asthma as a representative trait. B) predictive performance of P+T for European (EUR) samples in the UK Biobank (UKBB). The  $R^2$  for asthma is shown as a representative result. Full results are shown in Figure S7 and Table S3. C) the ratio of  $N_{eff}$  of EUR compared with  $N_{eff}$  of all samples for asthma.

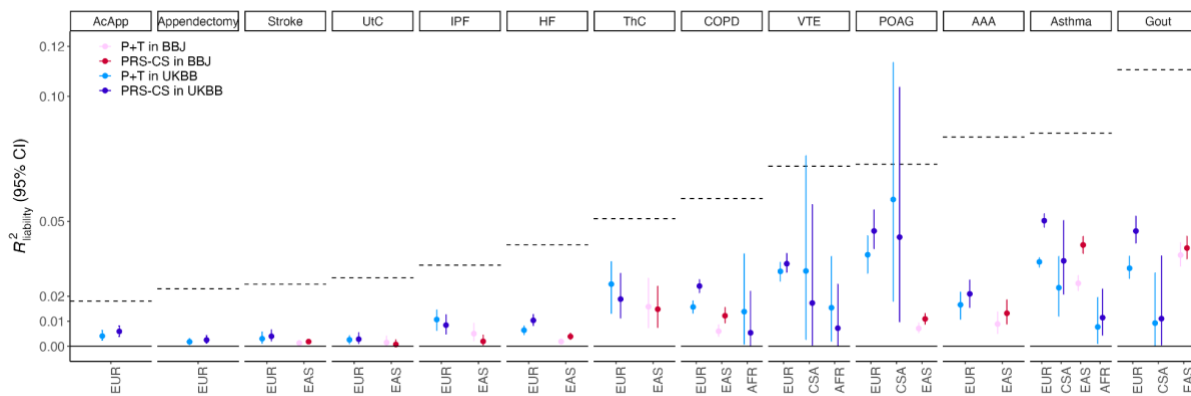

**Figure 4. Prediction performance using P+T versus that using PRS-CS.**

The phenotypes are ranked based on the SNP-based heritability as shown in **Figure 2** (indicated by the dashed line) estimates using all ancestries. Only trait-ancestry pairs with significant accuracies in both P+T and PRS-CS are presented. The prediction accuracy in P+T was estimated in the test cohort based on the optimal  $p$ -value thresholds fine-tuned in the validation cohort. The auto model was used for PRS-CS. Abbreviations: Europeans (EUR), Admixed Americans (AMR), Middle Eastern (MID), Central and South Asians (CSA), East Asians (EAS) and Africans (AFR), chronic obstructive pulmonary disease (COPD), heart failure (HF), acute appendicitis (AcApp), venous thromboembolism (VTE), primary open-angle glaucoma (POAG), uterine cancer (UtC), abdominal aortic aneurysm (AAA), idiopathic pulmonary fibrosis (IPF), thyroid cancer (ThC).

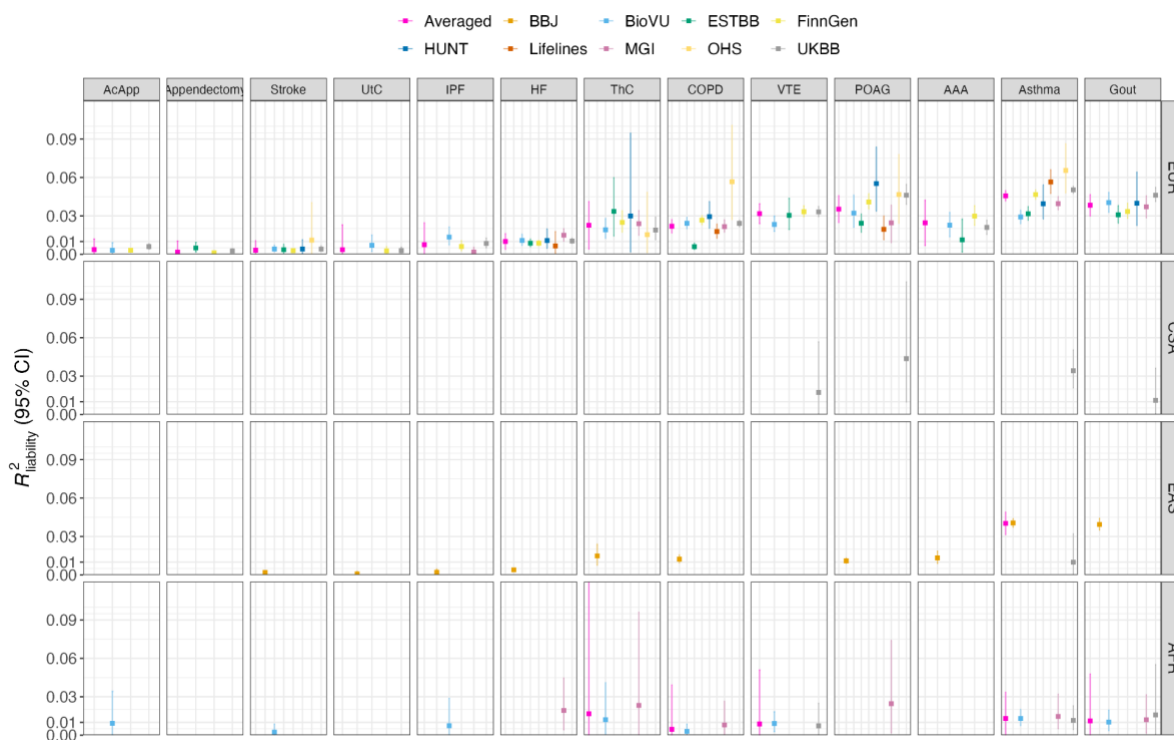

**Figure 5. Prediction performance of PRS-CS across biobanks and ancestries.**

The phenotypes on the y-axis were ranked by the SNP-based heritability using all ancestries as shown in Figure 2. Only the significant results were shown. Data for all trait-ancestry pairs in each biobank are provided in **Table S6**. Note that we removed the estimates in AMR and MID due to limited information as a result of small sample sizes. Abbreviations: Europeans (EUR), Admixed Americans (AMR), Middle Eastern (MID), Central and South Asians (CSA), East Asians (EAS) and Africans (AFR), chronic obstructive pulmonary disease (COPD), heart failure (HF), acute appendicitis (AcApp), venous thromboembolism (VTE), primary open-angle glaucoma (POAG), uterine cancer (UtC), abdominal aortic aneurysm (AAA), idiopathic pulmonary fibrosis (IPF), thyroid cancer (ThC).

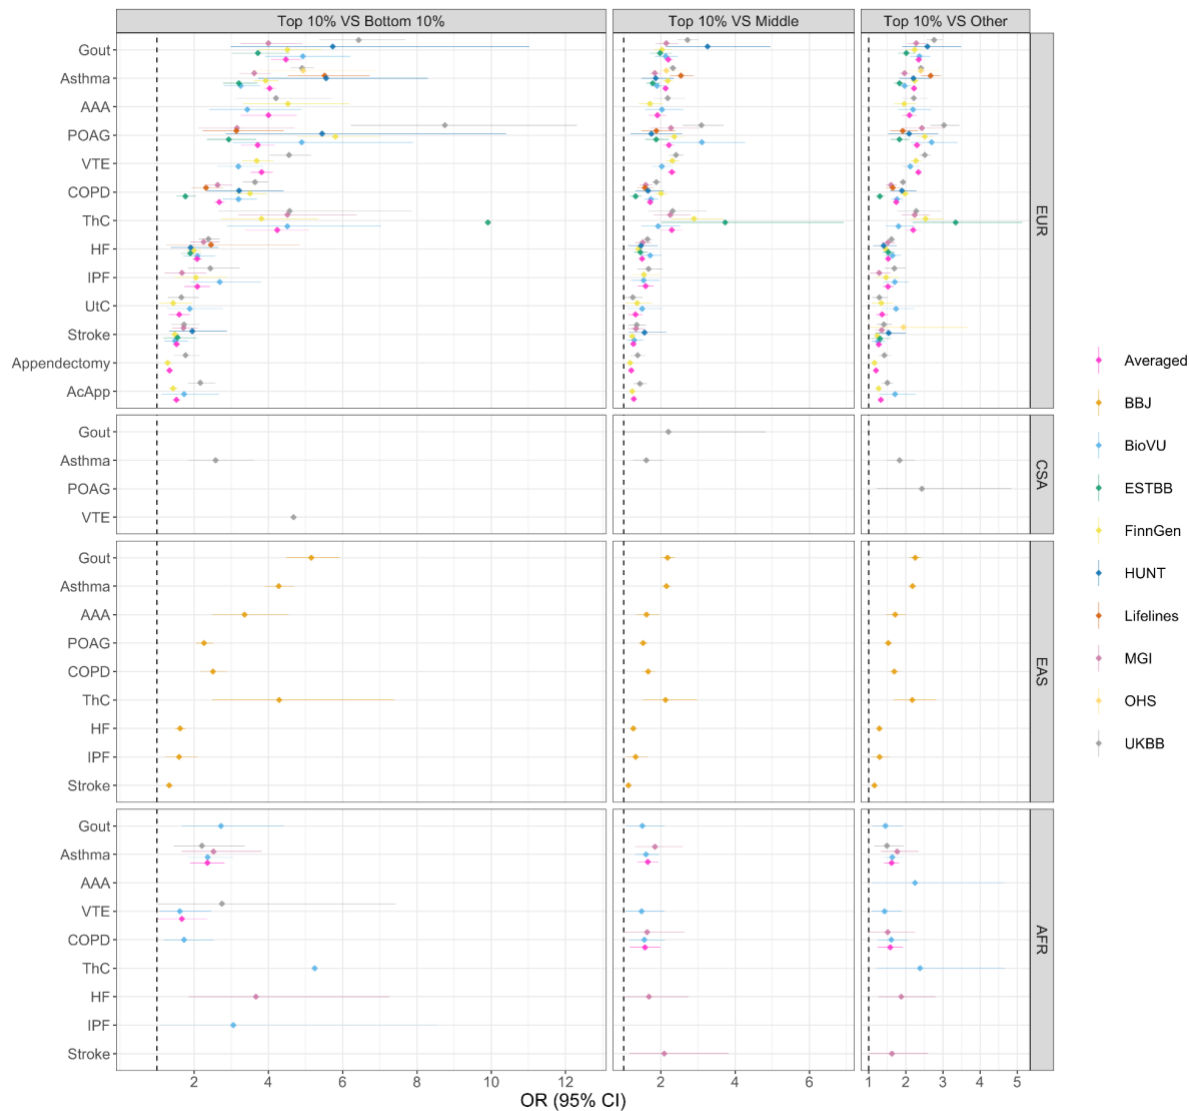

**Figure 6. The odds ratio (OR) between different PRS strata for endpoints in GBMI.**

The dashed line indicates OR=1. Only significant trait-ancestry specific OR was reported, with  $p$ -value  $< 0.05$ . The full results are shown in Table S7. The averaged OR was calculated using the inverse-variance weighted method (see STAR Methods). PRS was stratified into deciles with the first decile (bottom 10%) used as the referenced group. The phenotypes were ranked based on SNP-based heritability estimates using all ancestries (see Figure 2). Abbreviations: Europeans (EUR), Admixed Americans (AMR), Middle Eastern (MID), Central and South Asians (CSA), East Asians (EAS) and Africans (AFR), chronic obstructive pulmonary disease (COPD), heart failure (HF), acute appendicitis (AcApp), venous thromboembolism (VTE), primary open-angle glaucoma (POAG), uterine cancer (UtC), abdominal aortic aneurysm (AAA), idiopathic pulmonary fibrosis (IPF), thyroid cancer (ThC).

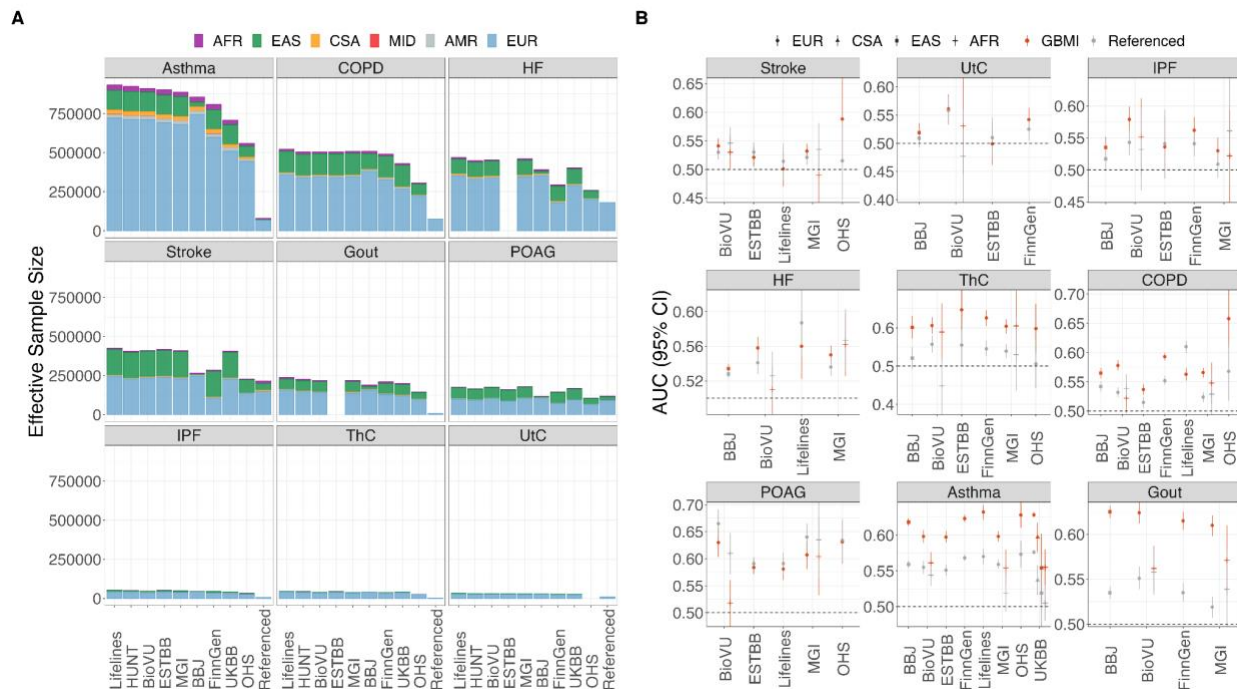

**Figure 7. The prediction performance and ancestry compositions of GBMI versus previously published GWAS.**

A) The ancestry compositions of GBMI and referenced GWAS. The label for biobanks in the x-axis indicated the leave-one-out-biobank meta-analyzed GWAS in GBMI. The previously published GWAS was labeled as Referenced. B) The comparison of AUC between GBMI and referenced GWAS. The AUC was calculated by fitting PRS only. The phenotypes in A) were ranked based on the effective sample sizes from all ancestries. The phenotypes in B) were ranked by the SNP-based heritability estimates from all ancestries. Note that we removed the estimates in AMR and MID due to limited information as a result of small sample sizes. The full results are shown in **Table S4**. Abbreviations: Europeans (EUR), Admixed Americans (AMR), Middle Eastern (MID), Central and South Asians (CSA), East Asians (EAS) and Africans (AFR), chronic obstructive pulmonary disease (COPD), heart failure (HF), acute appendicitis (AcApp), venous thromboembolism (VTE), primary open-angle glaucoma (POAG), uterine cancer (UtC), abdominal aortic aneurysm (AAA), idiopathic pulmonary fibrosis (IPF), thyroid cancer (ThC).
