# Supplementary material for: Global biobank analyses provide lessons for developing polygenic risk scores across diverse cohorts
Source: bioRxiv or medRxiv preprint supplement (doi:10.1101/2021.11.18.21266545), 2022-09-07
Supplement: Supplementary file [file media-3.pdf]

Wei Zhou<sup>1,2,3</sup>, Masahiro Kanai<sup>1,2,3,4,5</sup>, Kuan-Han H Wu<sup>6</sup>, Humaira Rasheed<sup>7,8,9</sup>, Kristin Tsuo<sup>1,2,3</sup>, Jibril B Hirbo<sup>10,11</sup>, Ying Wang<sup>1,2,3</sup>, Arjun Bhattacharya<sup>12</sup>, Huiling Zhao<sup>9</sup>, Shinichi Namba<sup>5</sup>, Ida Surakka<sup>13</sup>, Brooke N Wolford<sup>6,7</sup>, Valeria Lo Faro<sup>14,15,16</sup>, Esteban A Lopera-Maya<sup>17</sup>, Kristi Läll<sup>18</sup>, Marie-Julie Favé<sup>19</sup>, Sinéad B Chapman<sup>2,3</sup>, Juha Karjalainen<sup>1,2,3,20</sup>, Mitja Kurki<sup>1,2,3,20</sup>, Maasha Mutaamba<sup>1,2,3,20</sup>, Juulia Partanen<sup>20</sup>, Ben M Brumpton<sup>7,21,22</sup>, Sameer Chavan<sup>23</sup>, Tzu-Ting Chen<sup>24</sup>, Michelle Daya<sup>23</sup>, Yi Ding<sup>12,25</sup>, Yen-Chen A Feng<sup>26,27</sup>, Christopher R Gignoux<sup>23</sup>, Sarah E Graham<sup>13</sup>, Whitney E Hornsby<sup>13</sup>, Nathan Ingold<sup>28,29</sup>, Ruth Johnson<sup>12,30</sup>, Triin Laisk<sup>18</sup>, Kuang Lin<sup>31</sup>, Jun Lv<sup>32</sup>, Iona Y Millwood<sup>31,33</sup>, Priit Palta<sup>18,20</sup>, Anita Pandit<sup>34</sup>, Michael H Preuss<sup>35</sup>, Unnur Thorsteinsdottir<sup>36</sup>, Jasmina Uzunovic<sup>19</sup>, Matthew Zawistowski<sup>34</sup>, Xue Zhong<sup>10,11</sup>, Archie Campbell<sup>37</sup>, Kristy Crooks<sup>23</sup>, Geertruida H de Bock<sup>38</sup>, Nicholas J Douville<sup>39,40</sup>, Sarah Finer<sup>41</sup>, Lars G Fritsche<sup>34</sup>, Christopher J Griffiths<sup>41</sup>, Yu Guo<sup>42</sup>, Karen A Hunt<sup>43</sup>, Takahiro Konuma<sup>5,44</sup>, Riccardo E Marioni<sup>37</sup>, Jansonius Nomdo<sup>14</sup>, Snehal Patil<sup>34</sup>, Nicholas Rafaels<sup>23</sup>, Anne Richmond<sup>45</sup>, Jonathan A Shortt<sup>23</sup>, Peter Straub<sup>10,11</sup>, Ran Tao<sup>11</sup>, Brett Vanderwerff<sup>34</sup>, Kathleen C Barnes<sup>23</sup>, Marike Boezen<sup>38</sup>, Zhengming Chen<sup>31,33</sup>, Chia-Yen Chen<sup>46</sup>, Judy Cho<sup>35</sup>, George Davey Smith<sup>9,47</sup>, Hilary K Finucane<sup>1,2,3</sup>, Lude Franke<sup>17</sup>, Eric R Gamazon<sup>10,11,48</sup>, Andrea Ganna<sup>1,2,20</sup>, Tom R Gaunt<sup>9</sup>, Tian Ge<sup>27,49</sup>, Hailiang Huang<sup>1,2</sup>, Jennifer Huffman<sup>50</sup>, Jukka T. Koskela<sup>20</sup>, Clara Lajonchere<sup>51,52</sup>, Matthew H Law<sup>28,29</sup>, Liming Li<sup>32</sup>, Cecilia M Lindgren<sup>53</sup>, Ruth JF Loos<sup>35,54</sup>, Stuart MacGregor<sup>28</sup>, Koichi Matsuda<sup>55</sup>, Catherine M Olsen<sup>28</sup>, David J Porteous<sup>37</sup>, Jordan A Shavit<sup>56</sup>, Harold Snieder<sup>38</sup>, Richard C Trembath<sup>57</sup>, Judith M Vonk<sup>38</sup>, David Whiteman<sup>28</sup>, Stephen J Wicks<sup>23</sup>, Cisca Wijmenga<sup>17</sup>, John Wright<sup>58</sup>, Jie Zheng<sup>9</sup>, Xiang Zhou<sup>34</sup>, Philip Awadalla<sup>19,59</sup>, Michael Boehnke<sup>34</sup>, Nancy J Cox<sup>10,11</sup>, Daniel H Geschwind<sup>51,60,61</sup>, Caroline Hayward<sup>45</sup>, Kristian Hveem<sup>7,21</sup>, Eimear E Kenny<sup>62</sup>, Yen-Feng Lin<sup>24,63,64</sup>, Reedik Mägi<sup>18</sup>, Hilary C Martin<sup>65</sup>, Sarah E Medland<sup>28</sup>, Yukinori Okada<sup>5,66,67,68,69</sup>, Aarno V Palotie<sup>1,2,20</sup>, Bogdan Pasaniuc<sup>12,25,51,60,70</sup>, Serena Sanna<sup>17,71</sup>, Jordan W Smoller<sup>27</sup>, Kari Stefansson<sup>36</sup>, David A van Heel<sup>43</sup>, Robin G Walters<sup>31,33</sup>, Sebastian Zöllner<sup>34</sup>, Biobank Japan, BioMe, BioVU, Canadian Partnership for Tomorrow's Health/Ontario Health Study, China Kadoorie Biobank Collaborative Group, Colorado Center for Personalized Medicine, deCODE Genetics, Estonian Biobank, FinnGen, Generation Scotland, Genes & Health, LifeLines, Mass General Brigham Biobank, Michigan Genomics Initiative, QIMR Berghofer Biobank, Taiwan Biobank, The HUNT Study, UCLA ATLAS Community Health Initiative, UK Biobank, Alicia R Martin<sup>1,2,3</sup>, Cristen J Willer<sup>6,13,72\*</sup>, Mark J Daly<sup>1,2,3,20\*</sup>, Benjamin M Neale<sup>1,2,3\*</sup>

‡Deceased

\*These authors jointly supervised this work

<sup>1</sup>Analytic and Translational Genetics Unit, Department of Medicine, Massachusetts General Hospital, Boston, MA, USA, <sup>2</sup>Stanley Center for Psychiatric Research, Broad Institute of MIT and Harvard, Cambridge, MA, USA, <sup>3</sup>Program in Medical and Population Genetics, Broad Institute of MIT and Harvard, Cambridge, MA, USA, <sup>4</sup>Department of Biomedical Informatics, Harvard Medical School, Boston, MA, USA, <sup>5</sup>Department of Statistical Genetics, Osaka University Graduate School of Medicine, Suita 565-0871, Japan, <sup>6</sup>Department of Computational Medicine and Bioinformatics, University of Michigan, Ann Arbor, MI, USA, <sup>7</sup>K.G. Jebsen Center for Genetic Epidemiology, Department of Public Health and Nursing, NTNU, Norwegian University of Science and Technology, Trondheim, Norway, <sup>8</sup>Division of Medicine and Laboratory Sciences, University of Oslo, Norway, <sup>9</sup>MRC Integrative Epidemiology Unit (IEU), Bristol Medical School, University of Bristol, Bristol, UK, <sup>10</sup>Department of Medicine, Division of Genetic Medicine, Vanderbilt University Medical Center, Nashville, TN, USA, <sup>11</sup>Vanderbilt Genetics Institute, Vanderbilt University

Medical Center, Nashville, TN, USA, <sup>12</sup>Department of Pathology and Laboratory Medicine, David Geffen School of Medicine, University of California, Los Angeles, Los Angeles, CA, USA, <sup>13</sup>Department of Internal Medicine, Division of Cardiology, University of Michigan, Ann Arbor, MI, USA, <sup>14</sup>University of Groningen, UMCG, Department of Ophthalmology, Groningen, the Netherlands, <sup>15</sup>Department of Clinical Genetics, Amsterdam University Medical Center (AMC), Amsterdam, the Netherlands, <sup>16</sup>Department of Immunology, Genetics and Pathology, Science for Life Laboratory, Uppsala University, Uppsala, Sweden, <sup>17</sup>University of Groningen, UMCG, Department of Genetics, Groningen, the Netherlands, <sup>18</sup>Estonian Genome Centre, Institute of Genomics, University of Tartu, Tartu, Estonia, <sup>19</sup>Ontario Institute for Cancer Research, Toronto, ON, Canada, <sup>20</sup>Institute for Molecular Medicine Finland, University of Helsinki, Helsinki, Finland, <sup>21</sup>HUNT Research Centre, Department of Public Health and Nursing, NTNU, Norwegian University of Science and Technology, Levanger, Norway, <sup>22</sup>Clinic of Medicine, St. Olavs Hospital, Trondheim University Hospital, Trondheim, Norway, <sup>23</sup>University of Colorado - Anschutz Medical Campus, Aurora, CO, USA, <sup>24</sup>Center for Neuropsychiatric Research, National Health Research Institutes, Miaoli, Taiwan, <sup>25</sup>Bioinformatics Interdepartmental Program, University of California, Los Angeles, Los Angeles, CA, USA, <sup>26</sup>Division of Biostatistics, Institute of Epidemiology and Preventive Medicine, College of Public Health, National Taiwan University, Taiwan, <sup>27</sup>Psychiatric and Neurodevelopmental Genetics Unit, Center for Genomic Medicine, Massachusetts General Hospital, Boston, MA, USA, <sup>28</sup>QIMR Berghofer Medical Research Institute, Brisbane, Australia, <sup>29</sup>Faculty of Health, School of Biomedical Sciences, Queensland University of Technology, Australia, <sup>30</sup>Department of Computer Science, University of California, Los Angeles, Los Angeles, CA, USA, <sup>31</sup>Nuffield Department of Population Health, University of Oxford, Oxford, UK, <sup>32</sup>Department of Epidemiology and Biostatistics, School of Public Health, Peking University Health Science Center, Beijing, China, <sup>33</sup>MRC Population Health Research Unit, University of Oxford, Oxford, UK, <sup>34</sup>Department of Biostatistics and Center for Statistical Genetics, University of Michigan, Ann Arbor, MI, USA, <sup>35</sup>The Charles Bronfman Institute for Personalized Medicine, Icahn School of Medicine at Mount Sinai, New York, NY, USA, <sup>36</sup>deCODE Genetics/Amgen inc., 101, Reykjavik, Iceland, <sup>37</sup>Centre for Genomic and Experimental Medicine, Institute of Genetics and Cancer, University of Edinburgh, Edinburgh, UK, <sup>38</sup>University of Groningen, UMCG, Department of Epidemiology, Groningen, the Netherlands, <sup>39</sup>Department of Anesthesiology, Michigan Medicine, Ann Arbor, MI, USA, <sup>40</sup>Institute of Healthcare Policy & Innovation, University of Michigan, Ann Arbor, MI, USA, <sup>41</sup>Wolfson Institute of Population Health, Queen Mary University of London, London, UK, <sup>42</sup>Chinese Academy of Medical Sciences, Beijing, China, <sup>43</sup>Blizard Institute, Queen Mary University of London, London, UK, <sup>44</sup>Central Pharmaceutical Research Institute, JAPAN TOBACCO INC., Takatsuki 569-1125, Japan, <sup>45</sup>Medical Research Council Human Genetics Unit, Institute of Genetics and Cancer, University of Edinburgh, Edinburgh, UK, <sup>46</sup>Biogen, Cambridge, MA, USA, <sup>47</sup>NIHR Bristol Biomedical Research Centre, Bristol, UK, <sup>48</sup>MRC Epidemiology Unit, University of Cambridge, Cambridge, UK, <sup>49</sup>Center for Precision Psychiatry, Massachusetts General Hospital, Boston, MA, USA, <sup>50</sup>Centre for Population Genomics, VA Boston Healthcare System, Boston, MA, USA, <sup>51</sup>Institute of Precision Health, University of California, Los Angeles, Los Angeles, CA, USA, <sup>52</sup>Program in Neurogenetics, Department of Neurology, David Geffen School of Medicine, University of California, Los Angeles, Los Angeles, CA, USA, <sup>53</sup>Big Data Institute, Li Ka Shing Centre for Health Information and Discovery, University of Oxford, Oxford, UK, <sup>54</sup>Novo Nordisk Foundation Center for Basic Metabolic Research, Faculty of Medicine and Health Sciences, University of Copenhagen, Copenhagen, Denmark, <sup>55</sup>Department of Computational Biology and Medical Sciences, Graduate school of Frontier Sciences, The University of Tokyo, Tokyo, Japan,

<sup>56</sup>University of Michigan, Department of Pediatrics, Ann Arbor MI 48109, <sup>57</sup>School of Basic and Medical Biosciences, Faculty of Life Sciences and Medicine, King's College London, London, UK, <sup>58</sup>Bradford Institute for Health Research, Bradford Teaching Hospitals National Health Service (NHS) Foundation Trust, Bradford, UK, <sup>59</sup>Department of Molecular Genetics, University of Toronto, Toronto, ON, Canada, <sup>60</sup>Department of Human Genetics, David Geffen School of Medicine, University of California, Los Angeles, Los Angeles, CA, USA, <sup>61</sup>Department of Neurology, David Geffen School of Medicine, University of California, Los Angeles, Los Angeles, CA, USA, <sup>62</sup>Institute for Genomic Health, Icahn School of Medicine at Mount Sinai, New York, NY, USA, <sup>63</sup>Department of Public Health & Medical Humanities, School of Medicine, National Yang Ming Chiao Tung University, Taipei, Taiwan, <sup>64</sup>Institute of Behavioral Medicine, College of Medicine, National Cheng Kung University, Tainan, Taiwan, <sup>65</sup>Medical and Population Genomics, Wellcome Sanger Institute, Hinxton, UK, <sup>66</sup>Center for Infectious Disease Education and Research (CiDER), Osaka University, Suita 565-0871, Japan, <sup>67</sup>Laboratory of Statistical Immunology, Immunology Frontier Research Center (WPI-IFReC), Osaka University, Suita 565-0871, Japan, <sup>68</sup>Laboratory for Systems Genetics, RIKEN Center for Integrative Medical Sciences, Yokohama, Japan, <sup>69</sup>Integrated Frontier Research for Medical Science Division, Institute for Open and Transdisciplinary Research Initiatives, Osaka University, Suita 565-0871, Japan, <sup>70</sup>Department of Computational Medicine, David Geffen School of Medicine, University of California, Los Angeles, Los Angeles, CA, USA, <sup>71</sup>Institute for Genetics and Biomedical Research (IRGB), National Research Council (CNR), Cagliari, Italy, <sup>72</sup>Department of Human Genetics, University of Michigan, Ann Arbor, MI, USA
